# Supplementary material for: Design, evaluation and future projections of the NARCliM2.0 CORDEX-CMIP6 Australasia regional climate ensemble
Source: Copernicus journal article supplement (doi:10.5194/gmd-2024-87), 2024-05-14
Supplement: Supplementary file 1 [file gmd-2024-87-supplement.pdf]

# Design, evaluation and future projections of the NARClIM2.0 CORDEX-CMIP6 Australasia regional climate ensemble

## Supporting Information

Giovanni Di Virgilio<sup>1,2</sup>, J. P. Evans<sup>2</sup>, F. Ji<sup>1</sup>, E. Tam<sup>1</sup>, J. Kala<sup>4</sup>, J. Andrys<sup>4</sup>, C. Thomas<sup>2</sup>, D. Choudhury<sup>1</sup>, C. Rocha<sup>1</sup>, S. White<sup>1</sup>, Y. Li<sup>1</sup>, M. El Rafei<sup>1</sup>, R. Goyal<sup>1</sup>, M. L. Riley<sup>1</sup> and Jyothi Lingala<sup>4</sup>

<sup>1</sup>*Climate & Atmospheric Science, NSW Department of Planning and Environment, Sydney, Australia*

<sup>2</sup>*Climate Change Research Centre, University of New South Wales, Sydney, Australia*

<sup>3</sup>*Australian Research Council Centre of Excellence for Climate Extremes, University of New South Wales, Sydney, Australia*

<sup>4</sup>*Environmental and Conservation Sciences, and Centre for Climate Impacted Terrestrial Ecosystems, Harry Butler Institute, Murdoch University, Murdoch, WA 6150, Australia*

Correspondence: Giovanni Di Virgilio ([giovanni.divirgilio@environment.nsw.gov.au](mailto:giovanni.divirgilio@environment.nsw.gov.au); [giovanni@unsw.edu.au](mailto:giovanni@unsw.edu.au))

**Table S1.** Example two- and three-dimensional variables used to force WRF RCM simulations with CMIP6 GCM data

| <b>Variable</b>              | <b>Description</b>           | <b>Units</b> | <b>Frequency</b>     |
|------------------------------|------------------------------|--------------|----------------------|
| orog                         | topography                   | m            | fix                  |
| sftlf                        | landsea mask                 | -            | fix                  |
| tos                          | sea surface temperature      | K            | 3, 6 hourly or daily |
| hus                          | 3D humidity                  | %            | 3 or 6 hourly        |
| ta                           | 3D temperature               | K            | 3 or 6 hourly        |
| ua                           | 3D u wind                    | m s-1        | 3 or 6 hourly        |
| va                           | 3D v wind                    | m s-1        | 3 or 6 hourly        |
| p                            | 3D pressure                  | Pa           | 3 or 6 hourly        |
| zg                           | 3D geopotential height       | m            | 3 or 6 hourly        |
| ps                           | 2D surface pressure          | Pa           | 3 or 6 hourly        |
| psl                          | 2D sea surface pressure      | Pa           | 3 or 6 hourly        |
| mrso                         | 3D soil moisture             | kg m-2       | 3 or 6 hourly        |
| ts                           | skin temperature             | K            | 3 or 6 hourly        |
| tas                          | 2D surface temperature       | K            | 3 or 6 hourly        |
| uas                          | 2D surface u wind            | m s-1        | 3 or 6 hourly        |
| vas                          | 2D surface v wind            | m s-1        | 3 or 6 hourly        |
| huss                         | 2D surface specific humidity | %            | 3 or 6 hourly        |
| siconc                       | 2D sea ice area percentage   | %            | 3 or 6 hourly        |
| tsl                          | soil temperature             | K            | 3 or 6 hourly        |
| land cover type /<br>landuse | land cover/land use          | -            | annual               |

**Table S2.** List of WRF parameterisations used in the phase I (N=36) tests. PBL = planetary boundary layer; SW = shortwave radiation; LW = longwave radiation

| RCM Configuration ID | PBL   | Microphysics | Cumulus | SW Radiation | LW Radiation | Land Surface Model |
|----------------------|-------|--------------|---------|--------------|--------------|--------------------|
| 010601040402         | YSU   | WSM6         | KF      | RRTMG        | RRTMG        | Noah Unified       |
| 010601040405         | YSU   | WSM6         | KF      | RRTMG        | RRTMG        | CLM                |
| 010602040402         | YSU   | WSM6         | BMJ     | RRTMG        | RRTMG        | Noah Unified       |
| 010602040405         | YSU   | WSM6         | BMJ     | RRTMG        | RRTMG        | CLM                |
| 010606040402         | YSU   | WSM6         | Tiedtke | RRTMG        | RRTMG        | Noah Unified       |
| 010606040405         | YSU   | WSM6         | Tiedtke | RRTMG        | RRTMG        | CLM                |
| 010801040402         | YSU   | Thompson     | KF      | RRTMG        | RRTMG        | Noah Unified       |
| 010801040405         | YSU   | Thompson     | KF      | RRTMG        | RRTMG        | CLM                |
| 010802040402         | YSU   | Thompson     | BMJ     | RRTMG        | RRTMG        | Noah Unified       |
| 010802040405         | YSU   | Thompson     | BMJ     | RRTMG        | RRTMG        | CLM                |
| 010806040402         | YSU   | Thompson     | Tiedtke | RRTMG        | RRTMG        | Noah Unified       |
| 010806040405         | YSU   | Thompson     | Tiedtke | RRTMG        | RRTMG        | CLM                |
| 050601040402         | MYNN2 | WSM6         | KF      | RRTMG        | RRTMG        | Noah Unified       |
| 050601040405         | MYNN2 | WSM6         | KF      | RRTMG        | RRTMG        | CLM                |
| 050602040402         | MYNN2 | WSM6         | BMJ     | RRTMG        | RRTMG        | Noah Unified       |
| 050602040405         | MYNN2 | WSM6         | BMJ     | RRTMG        | RRTMG        | CLM                |
| 050606040402         | MYNN2 | WSM6         | Tiedtke | RRTMG        | RRTMG        | Noah Unified       |
| 050606040405         | MYNN2 | WSM6         | Tiedtke | RRTMG        | RRTMG        | CLM                |
| 050801040402         | MYNN2 | Thompson     | KF      | RRTMG        | RRTMG        | Noah Unified       |
| 050801040405         | MYNN2 | Thompson     | KF      | RRTMG        | RRTMG        | CLM                |
| 050802040402         | MYNN2 | Thompson     | BMJ     | RRTMG        | RRTMG        | Noah Unified       |
| 050802040405         | MYNN2 | Thompson     | BMJ     | RRTMG        | RRTMG        | CLM                |
| 050806040402         | MYNN2 | Thompson     | Tiedtke | RRTMG        | RRTMG        | Noah Unified       |
| 050806040405         | MYNN2 | Thompson     | Tiedtke | RRTMG        | RRTMG        | CLM                |
| 070601040402         | ACM2  | WSM6         | KF      | RRTMG        | RRTMG        | Noah Unified       |
| 070601040405         | ACM2  | WSM6         | KF      | RRTMG        | RRTMG        | CLM                |
| 070602040402         | ACM2  | WSM6         | BMJ     | RRTMG        | RRTMG        | Noah Unified       |
| 070602040405         | ACM2  | WSM6         | BMJ     | RRTMG        | RRTMG        | CLM                |
| 070606040402         | ACM2  | WSM6         | Tiedtke | RRTMG        | RRTMG        | Noah Unified       |
| 070606040405         | ACM2  | WSM6         | Tiedtke | RRTMG        | RRTMG        | CLM                |
| 070801040402         | ACM2  | Thompson     | KF      | RRTMG        | RRTMG        | Noah Unified       |
| 070801040405         | ACM2  | Thompson     | KF      | RRTMG        | RRTMG        | CLM                |
| 070802040402         | ACM2  | Thompson     | BMJ     | RRTMG        | RRTMG        | Noah Unified       |
| 070802040405         | ACM2  | Thompson     | BMJ     | RRTMG        | RRTMG        | CLM                |
| 070806040402         | ACM2  | Thompson     | Tiedtke | RRTMG        | RRTMG        | Noah Unified       |
| 070806040405         | ACM2  | Thompson     | Tiedtke | RRTMG        | RRTMG        | CLM                |

**Fig. S1** WRF namelist settings for the CORDEX-CMIP6 NARClM2.0 RCMs R3-R5: left panel shows physics settings for each RCM; right panel shows settings universal to the RCMs.

|              | RCM                  | R3     | R5     | R3     | R5   |
|--------------|----------------------|--------|--------|--------|------|
| physics      | mp_physics           | 8      | 8      | 8      | 8    |
|              | ra_sw_physics        | 4      | 4      | 4      | 4    |
|              | ra_lw_physics        | 4      | 4      | 4      | 4    |
|              | sf_sfclay_physics    | 1      | 1      | 1      | 1    |
|              | sf_surface_physics   | 4      | 4      | 4      | 4    |
|              | bl_pbl_physics       | 5      | 7      | 5      | 7    |
|              | cu_physics           | 2      | 2      | 0      | 0    |
|              | sf_urban_physics     | 1      | 1      | 1      | 1    |
|              | radt                 | 10     | 10     | 10     | 10   |
|              | cutd                 | 0      | 0      | 0      | 0    |
|              | bltd                 | 0      | 0      | 0      | 0    |
|              | prec_acc_dt          | 60     | 60     | 60     | 60   |
|              | bucket_mm            | 1000   | 1000   | 1000   | 1000 |
|              | levsiz               | 59     | 59     | 59     | 59   |
|              | paerlev              | 29     | 29     | 29     | 29   |
|              | cam_abs_dim1         | 4      | 4      | 4      | 4    |
|              | cam_abs_dim2         | 45     | 45     | 45     | 45   |
|              | isfflx               | 1      | 1      | 1      | 1    |
|              | surface_input_source | 1      | 1      | 1      | 1    |
|              | num_soil_layers      | 4      | 4      | 4      | 4    |
| sst_update   | 1                    | 1      | 1      | 1      |      |
| tmn_update   | 1                    | 1      | 1      | 1      |      |
| lagday       | 150                  | 150    | 150    | 150    |      |
| sst_skin     | 1                    | 1      | 1      | 1      |      |
| usemonalb    | .True.               | .True. | .True. | .True. |      |
| rdmaxalb     | .True.               | .True. | .True. | .True. |      |
| slope_rad    | 1                    | 1      | 1      | 1      |      |
| topo_shading | 1                    | 1      | 1      | 1      |      |
| shadlen      | 25000                | 25000  | 25000  | 25000  |      |
| noah_mp      | dveg                 | 2      | 2      | 2      | 2    |
|              | opt_crs              | 1      | 1      | 1      | 1    |
|              | opt_sfc              | 1      | 1      | 1      | 1    |
|              | opt_btr              | 1      | 1      | 1      | 1    |
|              | opt_run              | 3      | 3      | 3      | 3    |
|              | opt_frz              | 1      | 1      | 1      | 1    |
|              | opt_inf              | 1      | 1      | 1      | 1    |
|              | opt_rad              | 3      | 3      | 3      | 3    |
|              | opt_alb              | 2      | 2      | 2      | 2    |
|              | opt_snf              | 1      | 1      | 1      | 1    |
|              | opt_tbot             | 2      | 2      | 2      | 2    |
|              | opt_stc              | 1      | 1      | 1      | 1    |
|              | opt_gla              | 1      | 1      | 1      | 1    |
|              | opt_rsf              | 1      | 1      | 1      | 1    |
|              | opt_soil             | 1      | 1      | 1      | 1    |
| opt_pedo     | 1                    | 1      | 1      | 1      |      |
| opt_crop     | 0                    | 0      | 0      | 0      |      |

|                         |                        |                |
|-------------------------|------------------------|----------------|
| time_control            |                        |                |
| run_days                | 6                      |                |
| run_hours               | 0                      |                |
| run_minutes             | 0                      |                |
| run_seconds             | 0                      |                |
| start_year              | 2016                   | 2016           |
| start_month             | 5                      | 5              |
| start_day               | 1                      | 1              |
| start_hour              | 0                      | 0              |
| start_minute            | 0                      | 0              |
| start_second            | 0                      | 0              |
| end_year                | 2016                   | 2016           |
| end_month               | 5                      | 5              |
| end_day                 | 7                      | 7              |
| end_hour                | 0                      | 0              |
| end_minute              | 0                      | 0              |
| end_second              | 0                      | 0              |
| interval_seconds        | 21600                  |                |
| input_from_file         | TRUE                   | TRUE           |
| history_interval        | 180                    | 180            |
| frames_per_outfile      | 8                      | 8              |
| restart                 | TRUE                   |                |
| restart_interval        | 1440                   |                |
| override_restart_timers | TRUE                   |                |
| write_hist_at_0h_rst    | TRUE                   |                |
| io_form_history         | 2                      |                |
| io_form_restart         | 2                      |                |
| io_form_input           | 2                      |                |
| io_form_boundary        | 2                      |                |
| debug_level             | 0                      |                |
| output_diagnostics      | 1                      |                |
| auxinput4_inname        | "wrfwmp_d<domain>      |                |
| auxinput4_interval      | 360                    | 360            |
| io_form_auxinput4       | 2                      |                |
| auxhist3_outname        | xtrm_d<domain> <date>  |                |
| io_form_auxhist3        | 2                      |                |
| auxhist3_interval       | 1440                   | 1440           |
| frames_per_auxhist3     | 6                      | 6              |
| auxhist4_outname        | friv_d<domain> <date>  |                |
| io_form_auxhist4        | 2                      |                |
| auxhist4_interval       | 60                     | 60             |
| frames_per_auxhist4     | 144                    | 144            |
| l_auxhist8_outname      | rfdiy_d<domain> <date> |                |
| l_auxhist8_interval     | 1440                   | 1440           |
| l_io_form_auxhist8      | 2                      |                |
| l_frames_per_auxhist8   | 6                      | 6              |
| iofields_filename       | "iofields.txt"         | "iofields.txt" |
| domains                 |                        |                |
| time_step               | 90                     |                |
| time_step_fract_num     | 0                      |                |
| time_step_fract_den     | 1                      |                |
| max_dom                 | 2                      |                |
| s_we                    | 1                      | 1              |
| e_we                    | 540                    | 616            |
| s_sn                    | 1                      | 1              |
| e_sn                    | 363                    | 501            |
| s_vert                  | 1                      | 1              |
| e_vert                  | 45                     | 45             |
| dzbot                   | 50                     |                |
| max_dz                  | 1000                   |                |
| dzstretch_s             | 1.2                    |                |
| dzstretch_u             | 1.05                   |                |
| p_top_requested         | 5000                   |                |
| dx                      | 19567.24               | 3913.447       |
| dy                      | 19567.24               | 3913.447       |
| grid_id                 | 1                      | 2              |
| parent_id               | 0                      | 1              |
| l_parent_start          | 1                      | 205            |
| j_parent_start          | 1                      | 90             |
| parent_grid_ratio       | 1                      | 5              |
| parent_time_step_ratio  | 1                      | 5              |
| feedback                | 0                      |                |
| smooth_option           | 0                      |                |
| nproc_x                 | -1                     |                |
| nproc_y                 | -1                     |                |
| dynamics                |                        |                |
| rk_ord                  | 3                      |                |
| w_damping               | 1                      |                |
| diff_opt                | 1                      | 1              |
| km_opt                  | 4                      | 4              |
| diff_6th_opt            | 0                      | 0              |
| diff_6th_factor         | 0.12                   |                |
| base_temp               | 290                    |                |
| damp_opt                | 1                      |                |
| zdamo                   | 5000                   | 5000           |
| dampcoef                | 0.01                   | 0.01           |
| khdiff                  | 0                      | 0              |
| kvdiff                  | 0                      | 0              |
| non_hydrostatic         | TRUE                   | TRUE           |
| moist_adv_opt           | 1                      | 1              |
| scalar_adv_opt          | 1                      | 1              |
| gwd_opt                 | 1                      |                |
| bdy_control             |                        |                |
| spec_bdy_width          | 5                      |                |
| spec_zone               | 1                      |                |
| relax_zone              | 4                      |                |
| specified               | TRUE                   | FALSE          |
| nested                  | FALSE                  | TRUE           |
| namelist_quit           |                        |                |
| nio_tasks_per_group     | 0                      |                |
| nio_groups              | 0                      |                |

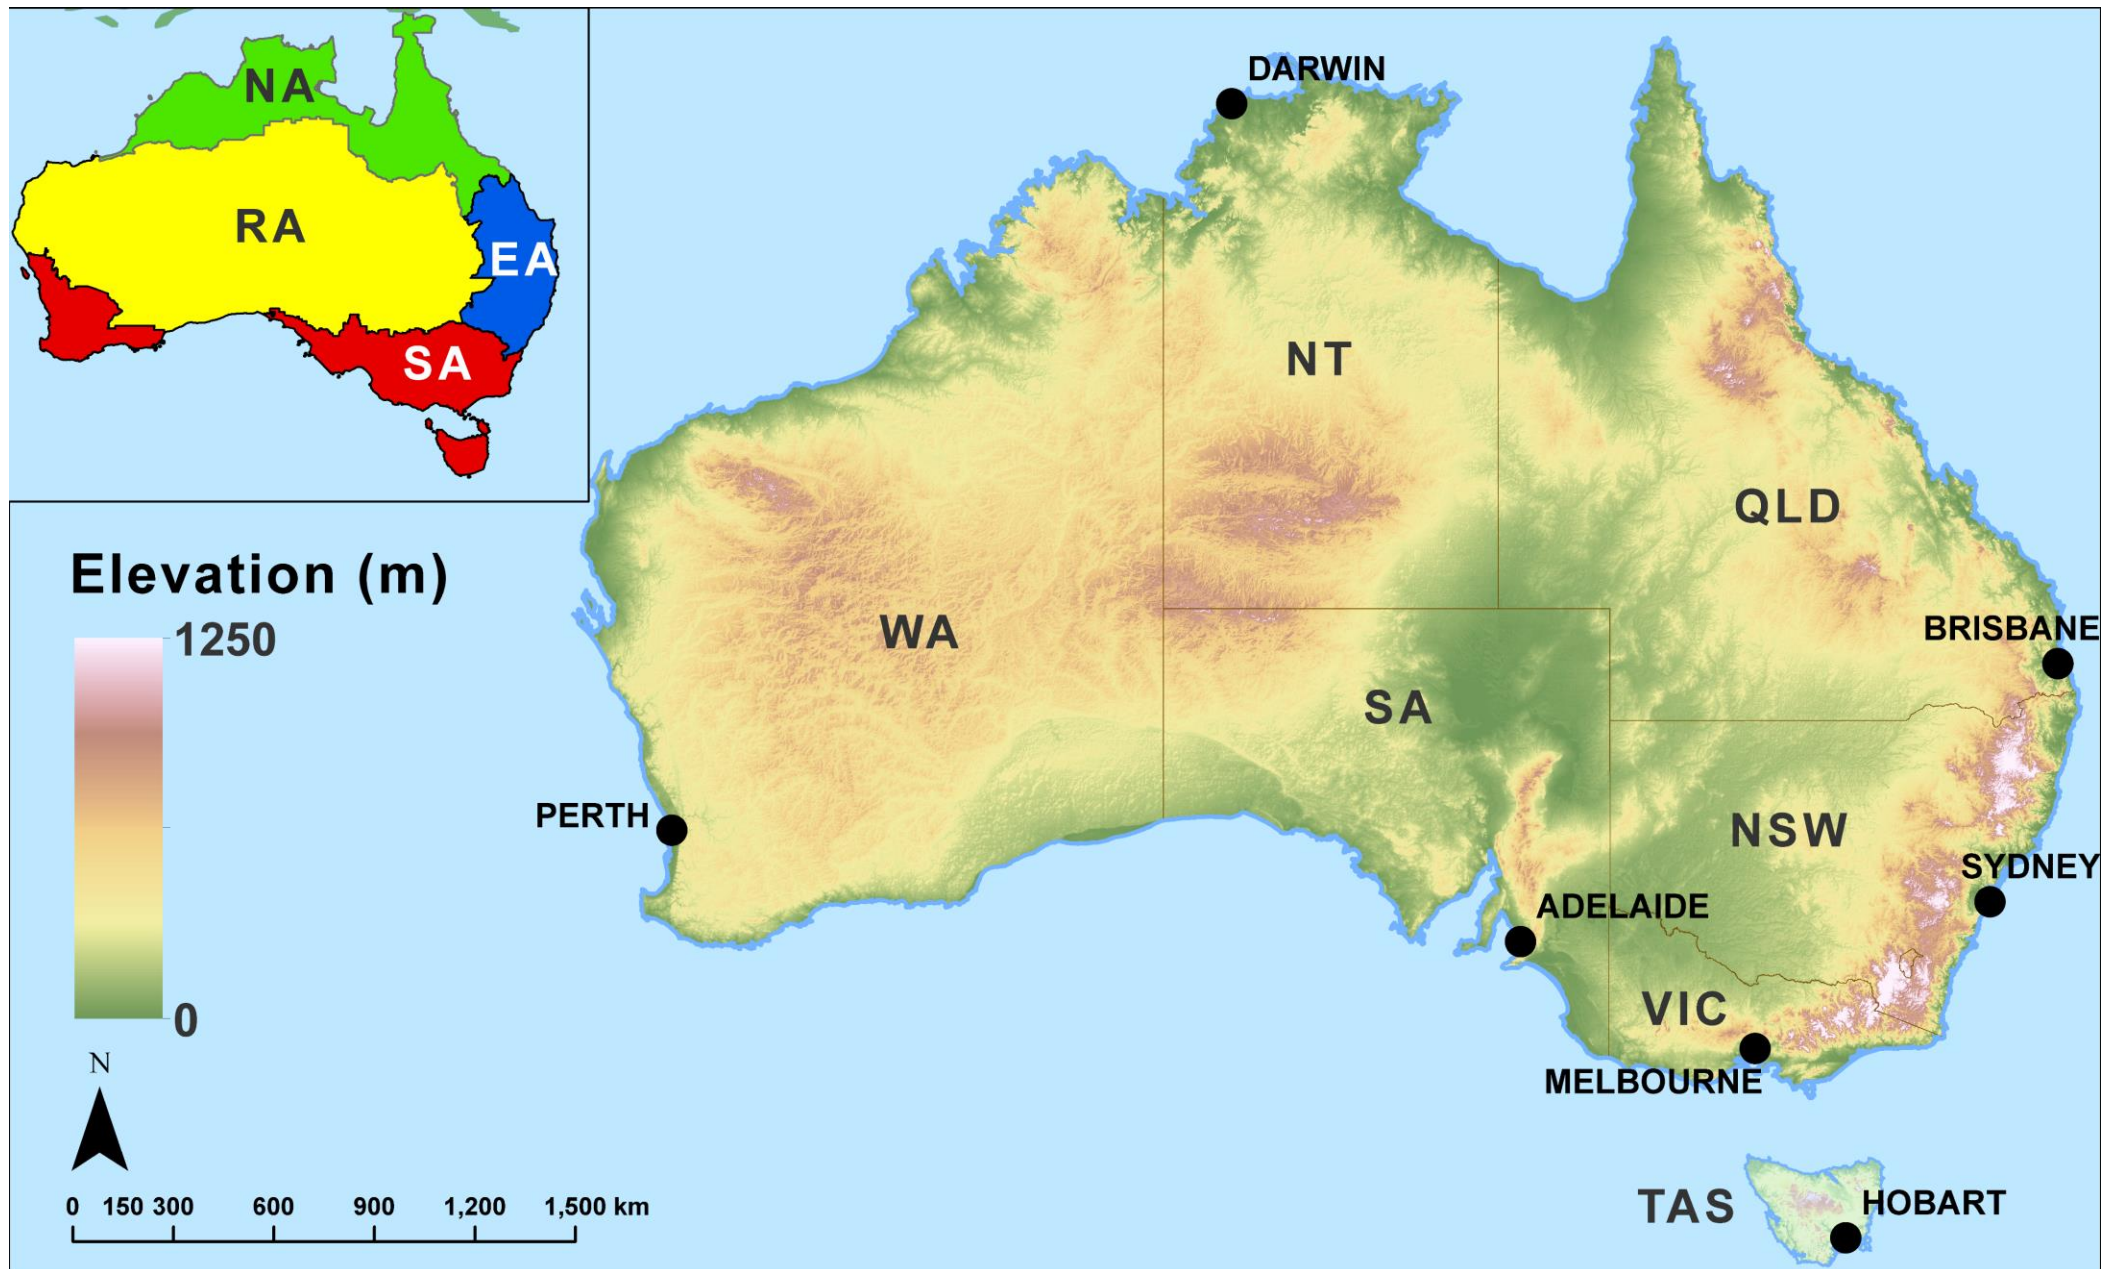

**Fig S2.** Australia, its states (NT=Northern Territory; QLD=Queensland; NSW=New South Wales; ACT = Australian Capital Territory; VIC = Victoria; SA = South Australia; WA = Western Australia), and major cities. **Inset:** Natural Resource Management (NRM) regions/climate zones (NA = Northern Australia; EA = Eastern Australia; SA = Southern Australia; RA = Rangelands).

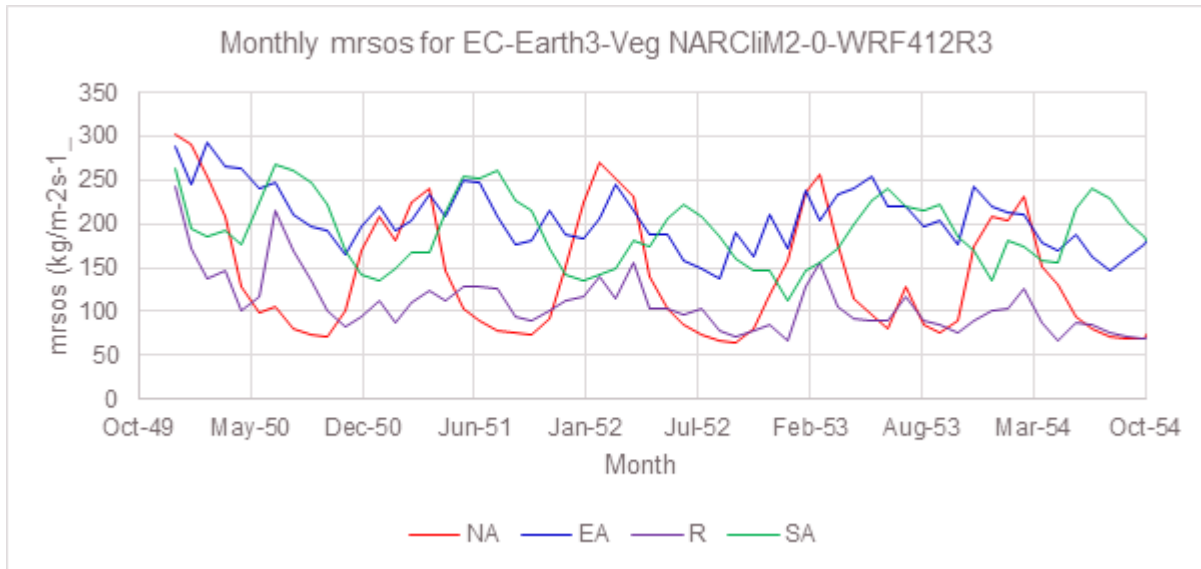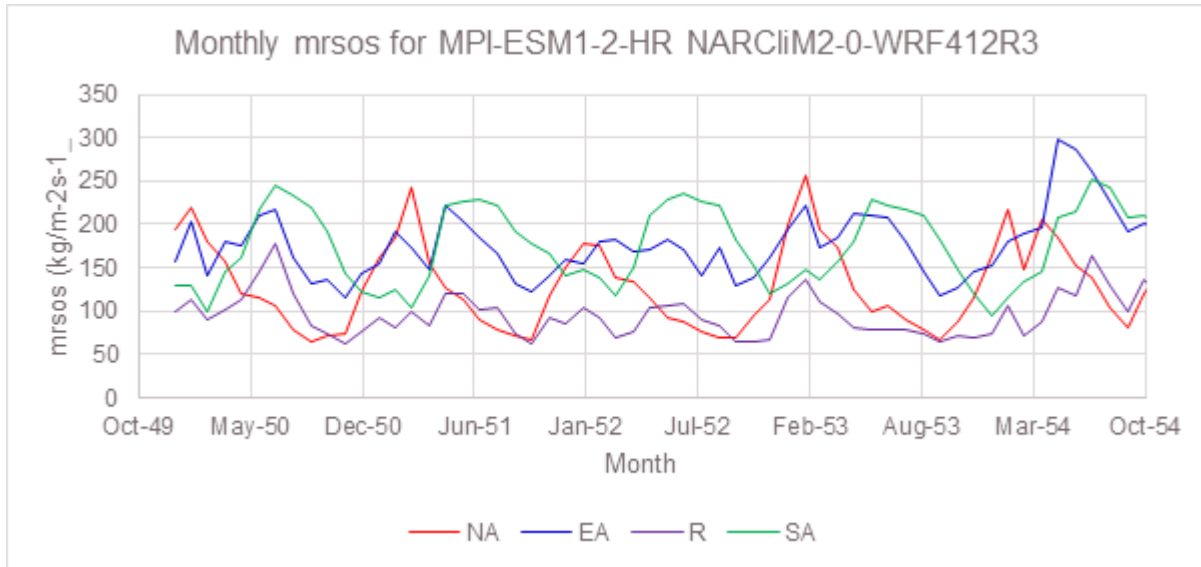

**Fig S3.** Natural Resource Management (NRM) regionally averaged soil moisture time series (1950-1954) for the EC-Earth3-Veg-forced R3 RCM (top) and MPI-ESM1-2-HR-forced R3 RCM (bottom) simulations. NA=Northern Australia, EA=Eastern Australia, R=rangelands, and SA=Southern Australia

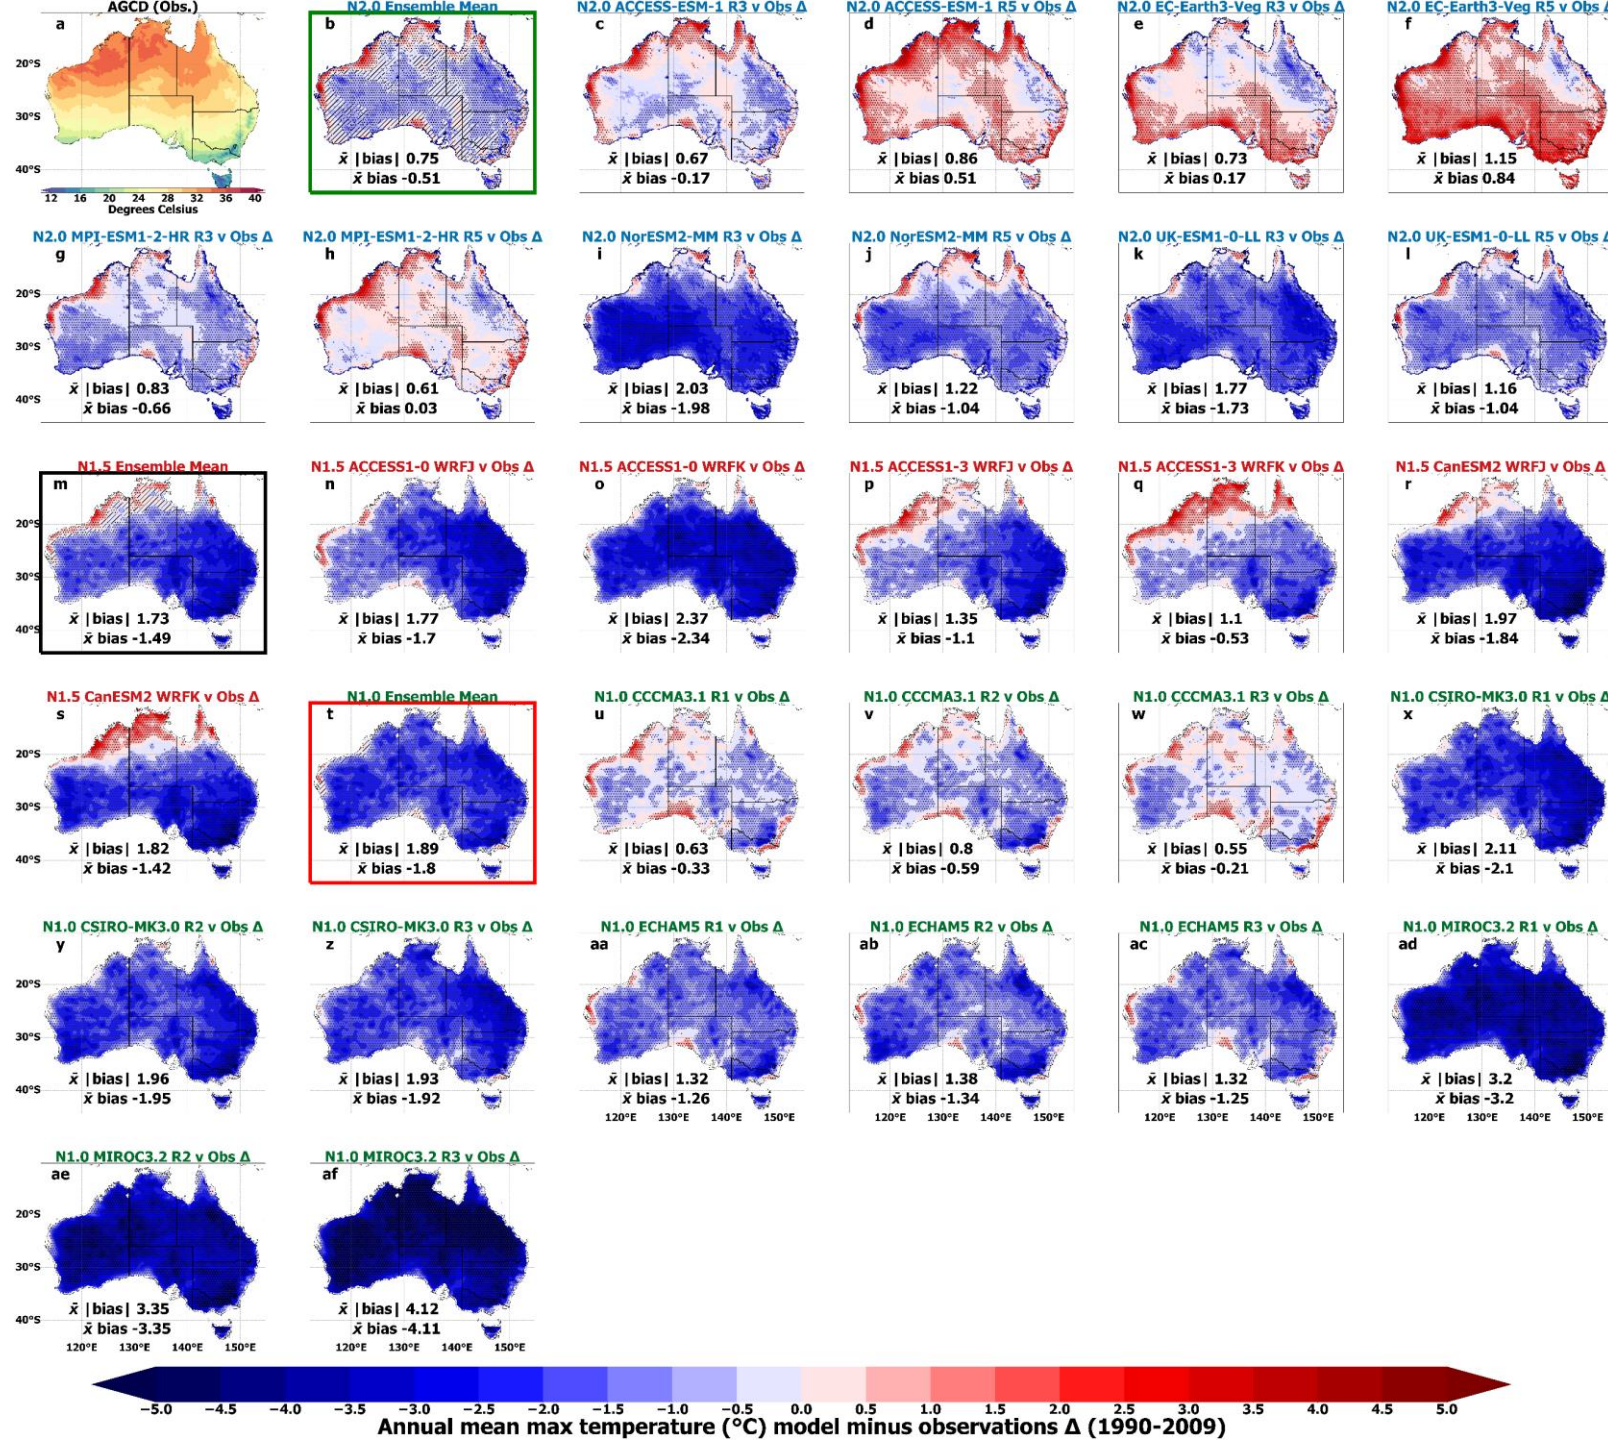

**Fig. S4** Annual mean near-surface atmospheric maximum temperature biases for NARCIIM2.0, 1.5 and 1.0 ensemble means and individual ensemble members with respect to Australian Gridded Climate Data (AGCD) observations for 1990-2009. Stippled areas indicate locations where an RCM shows statistically significant bias ( $P < 0.05$ ). Significance stippling for the ensemble mean bias follows Tebaldi et al. (2011). Statistically insignificant areas are shown in colour, denoting that less than half of the models are significantly biased. In significant agreeing areas (stippled), at least half of RCMs are significantly biased, and at least 70% of significant RCMs in each ensemble agree on the direction of the bias. Significant disagreeing areas are shown in hatching, which are where at least half of the models are significantly biased and less than 70% of significant models in each ensemble agree on the bias direction. Panel boundaries for ensemble means (b,m,t) in green (red) indicate the RCMs with lowest (highest) area-averaged mean absolute biases.

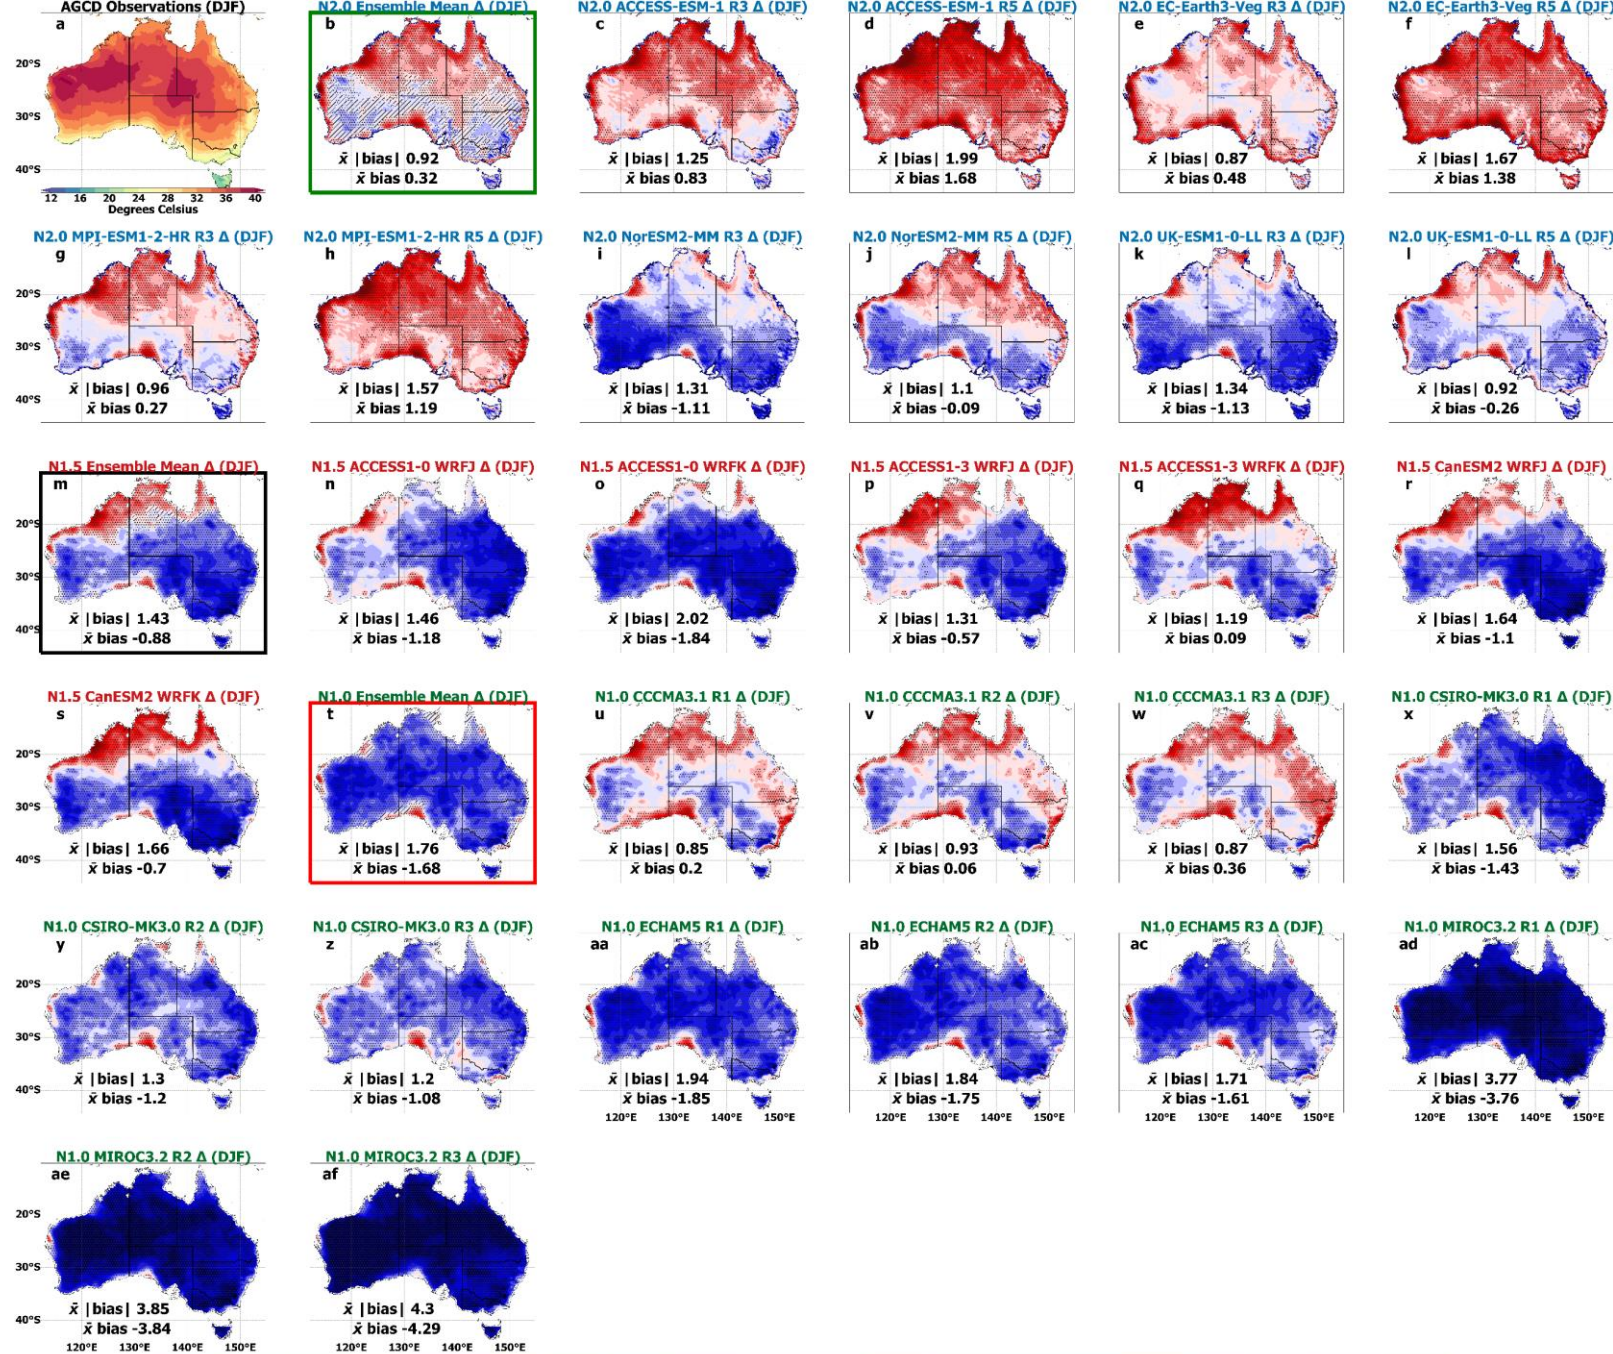

**Fig. 5** DJF mean near-surface atmospheric maximum temperature biases for NARcliM2.0, 1.5 and 1.0 ensemble means and individual ensemble members with respect to Australian Gridded Climate Data (AGCD) observations for 1990-2009. Stippling as per Fig.S4.



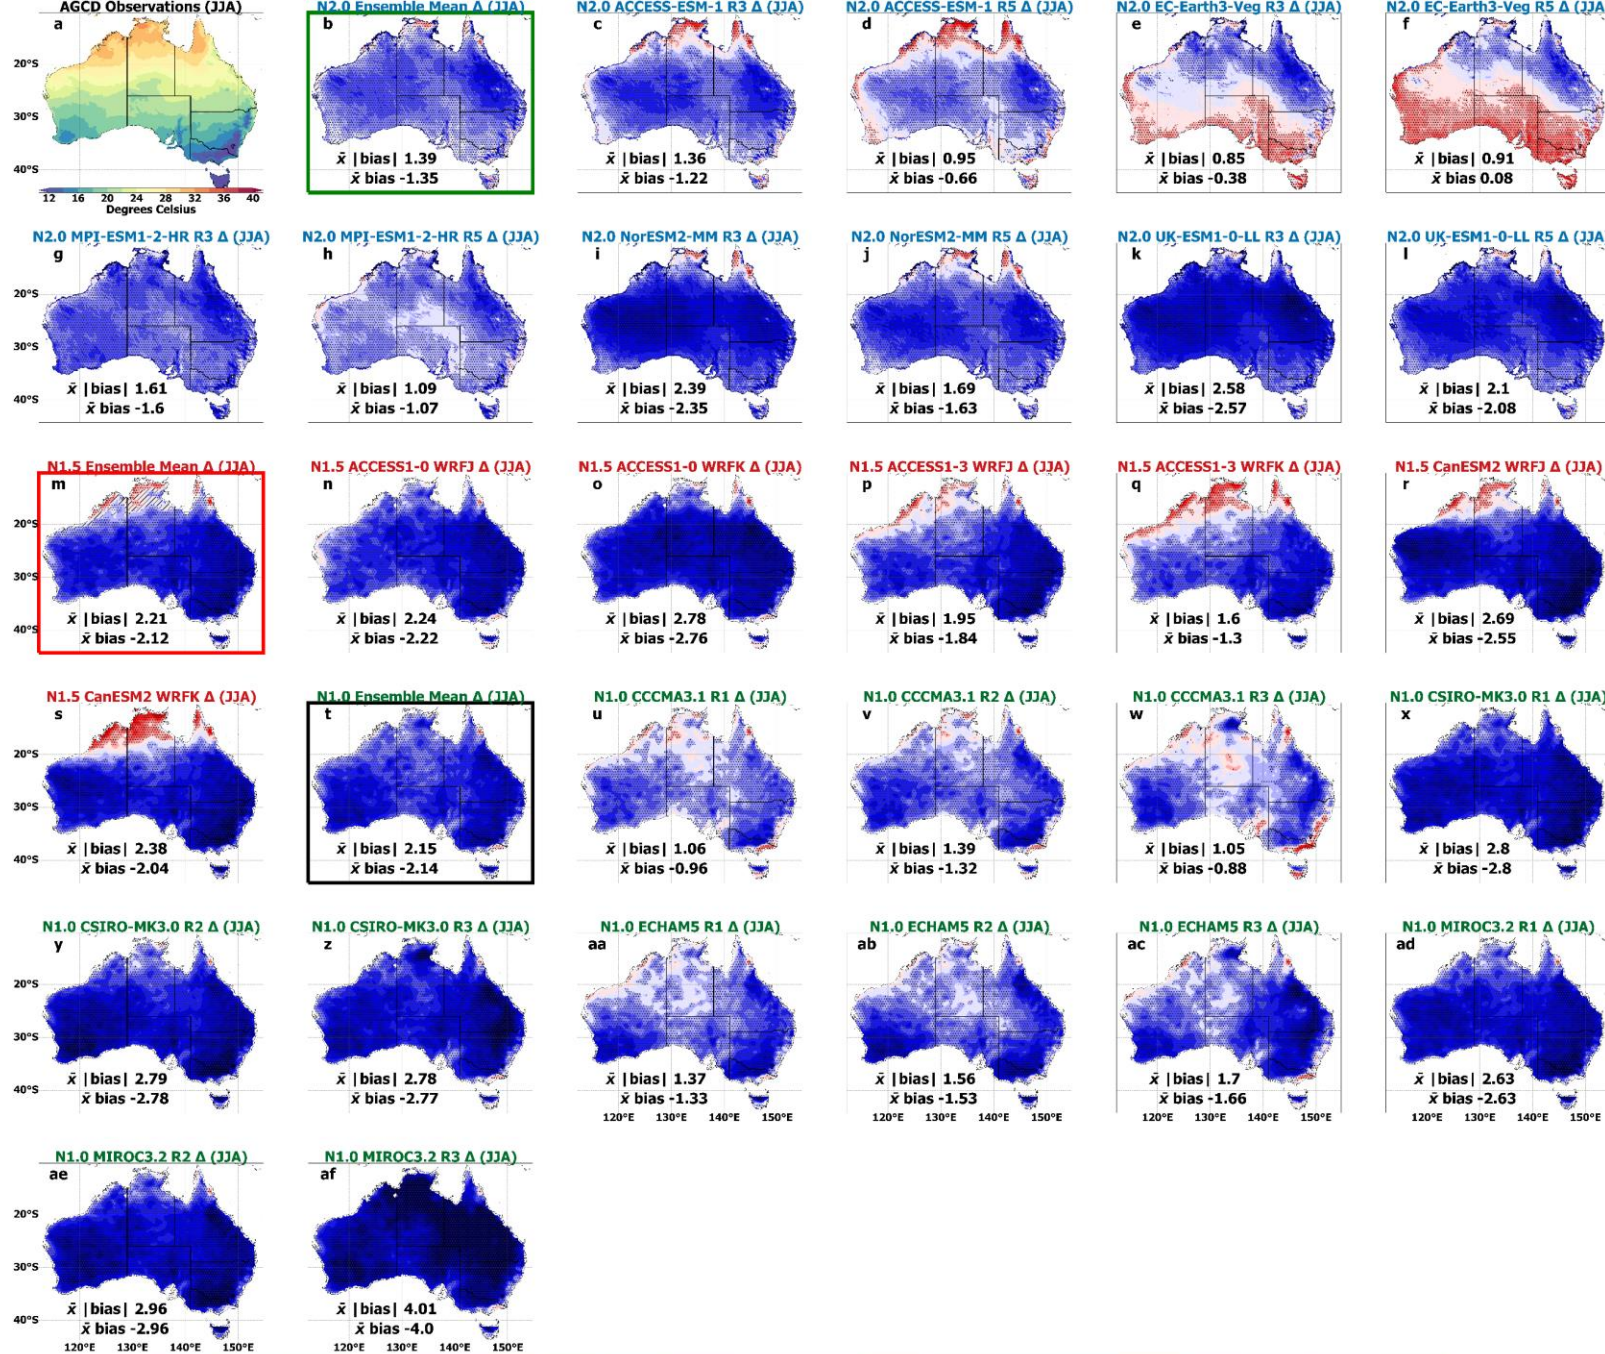

**Fig. S6** JJA mean near-surface atmospheric maximum temperature biases for NARClIM2.0, 1.5 and 1.0 ensemble means and individual ensemble members with respect to Australian Gridded Climate Data (AGCD) observations for 1990-2009. Stippling as per Fig.S4.

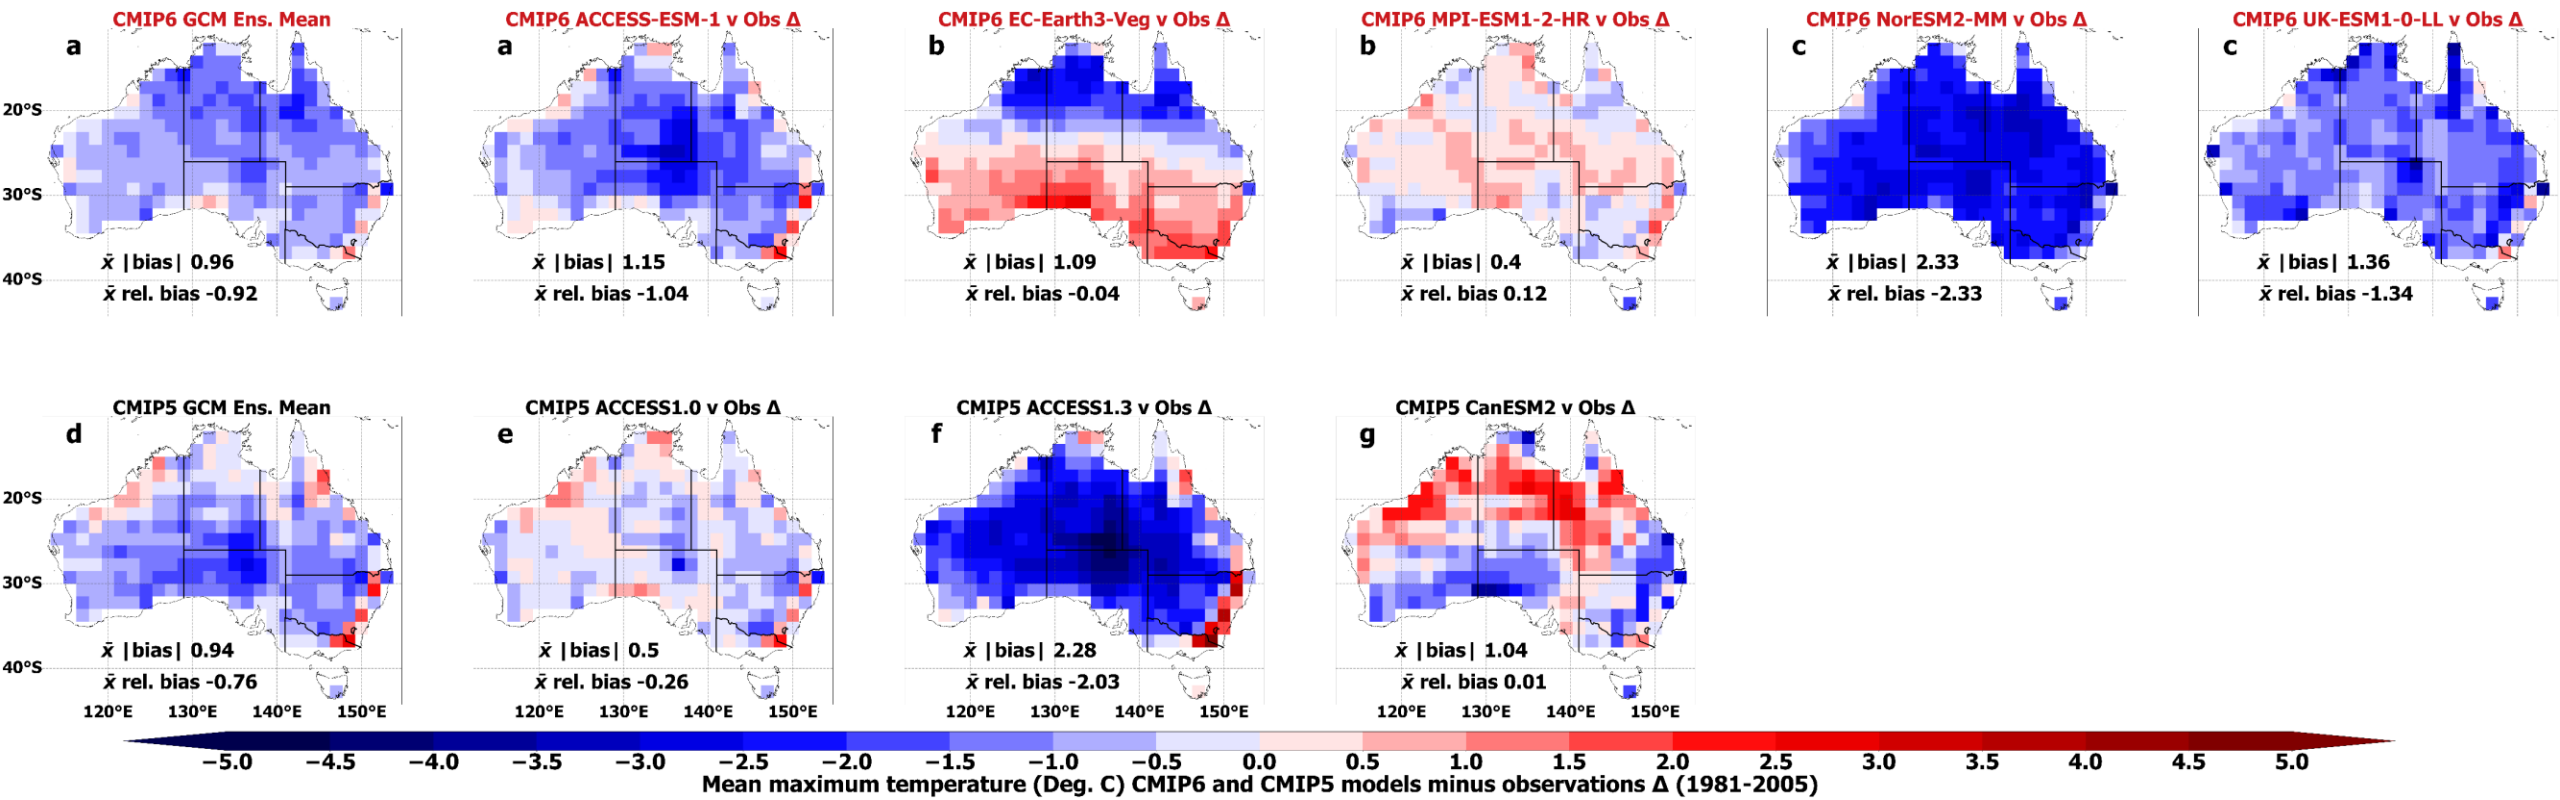

Figure S7. GCM annual mean maximum temperature bias relative to AGCD observations.

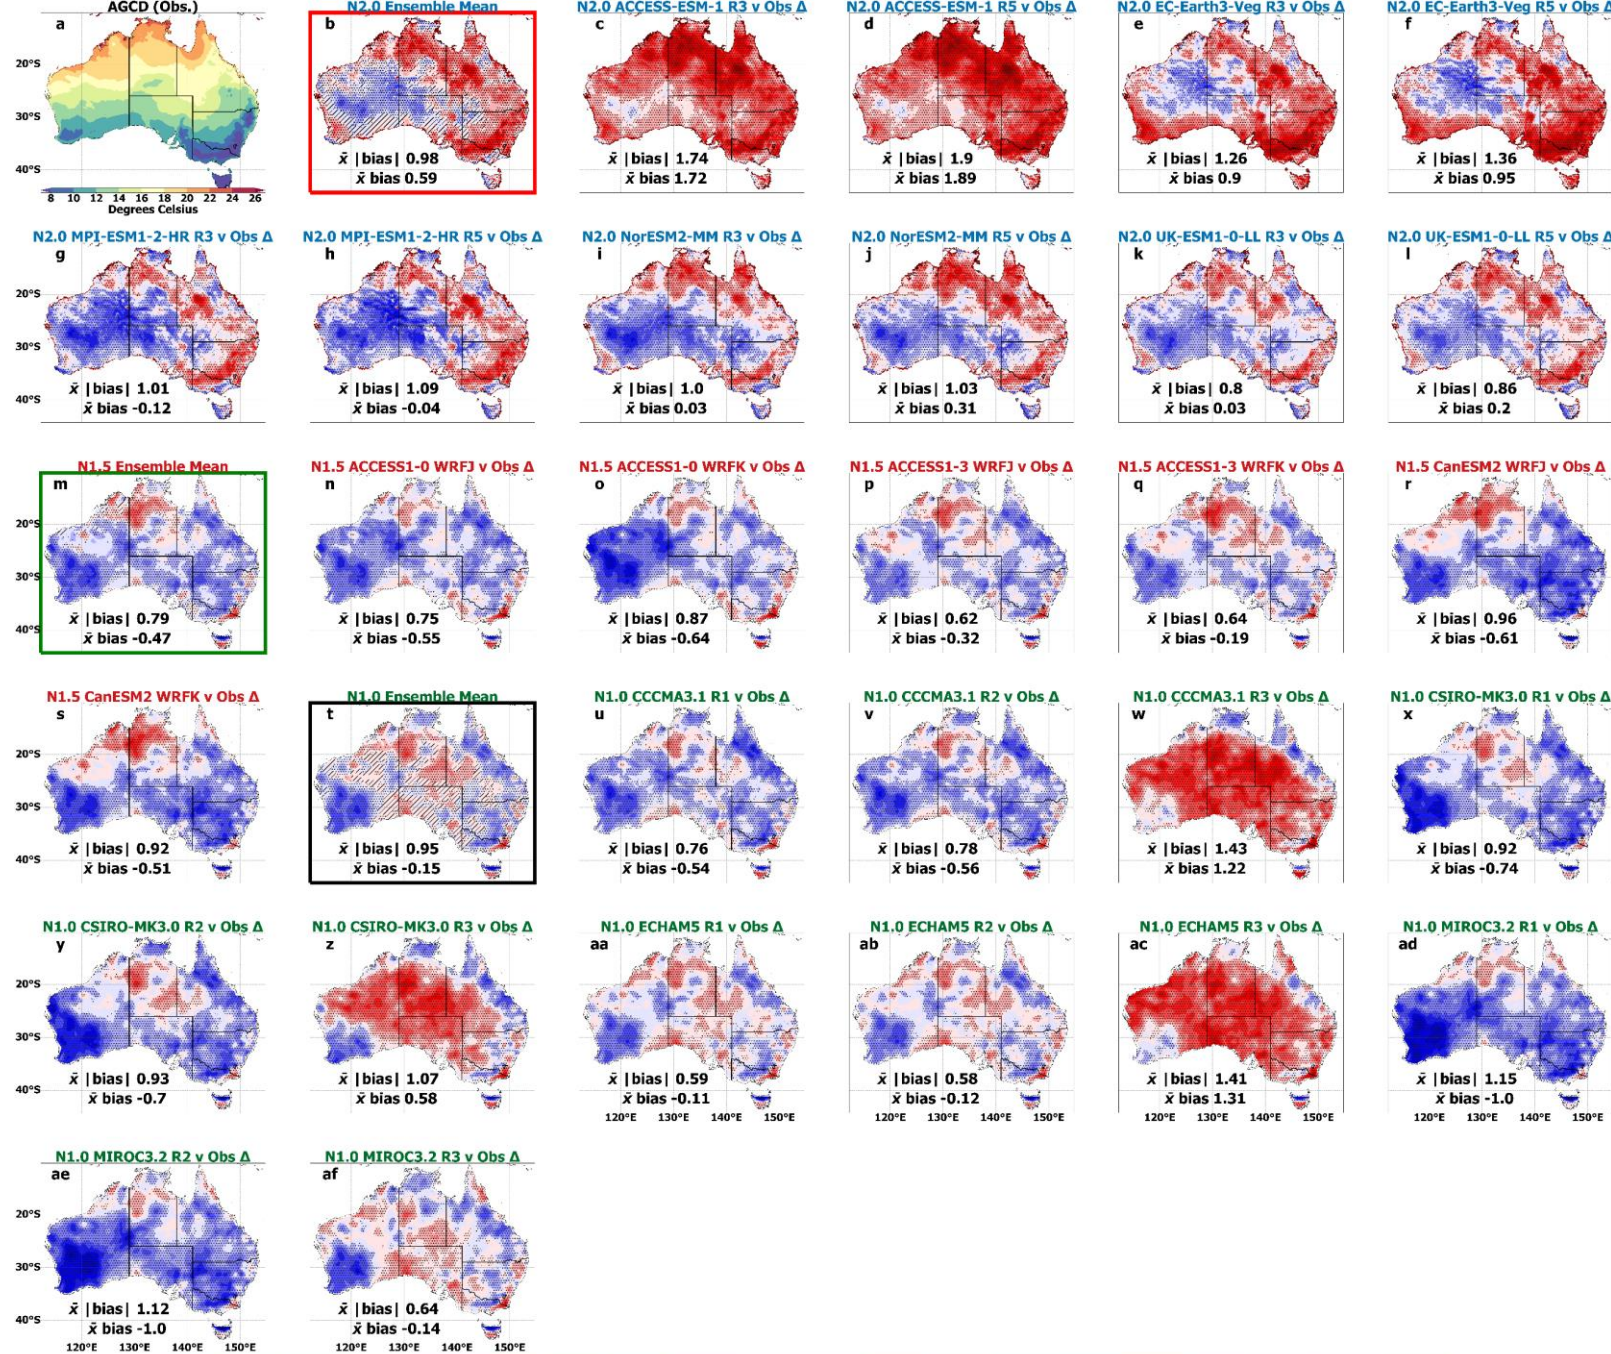

**Fig. S8** Annual mean near-surface atmospheric minimum temperature biases for NARClIM2.0, 1.5 and 1.0 ensemble means and individual ensemble members with respect to Australian Gridded Climate Data (AGCD) observations for 1990-2009. Panel boundaries for ensemble means (b,m,t) in green (red) indicate the RCMs with lowest (highest) area-averaged mean absolute biases. Stippling as per Fig.S4.

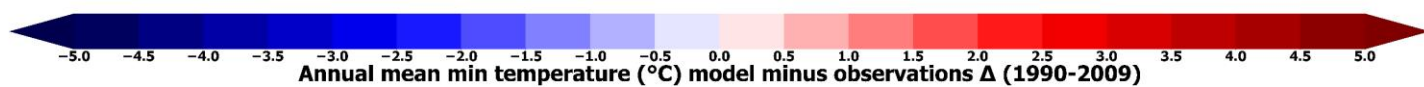

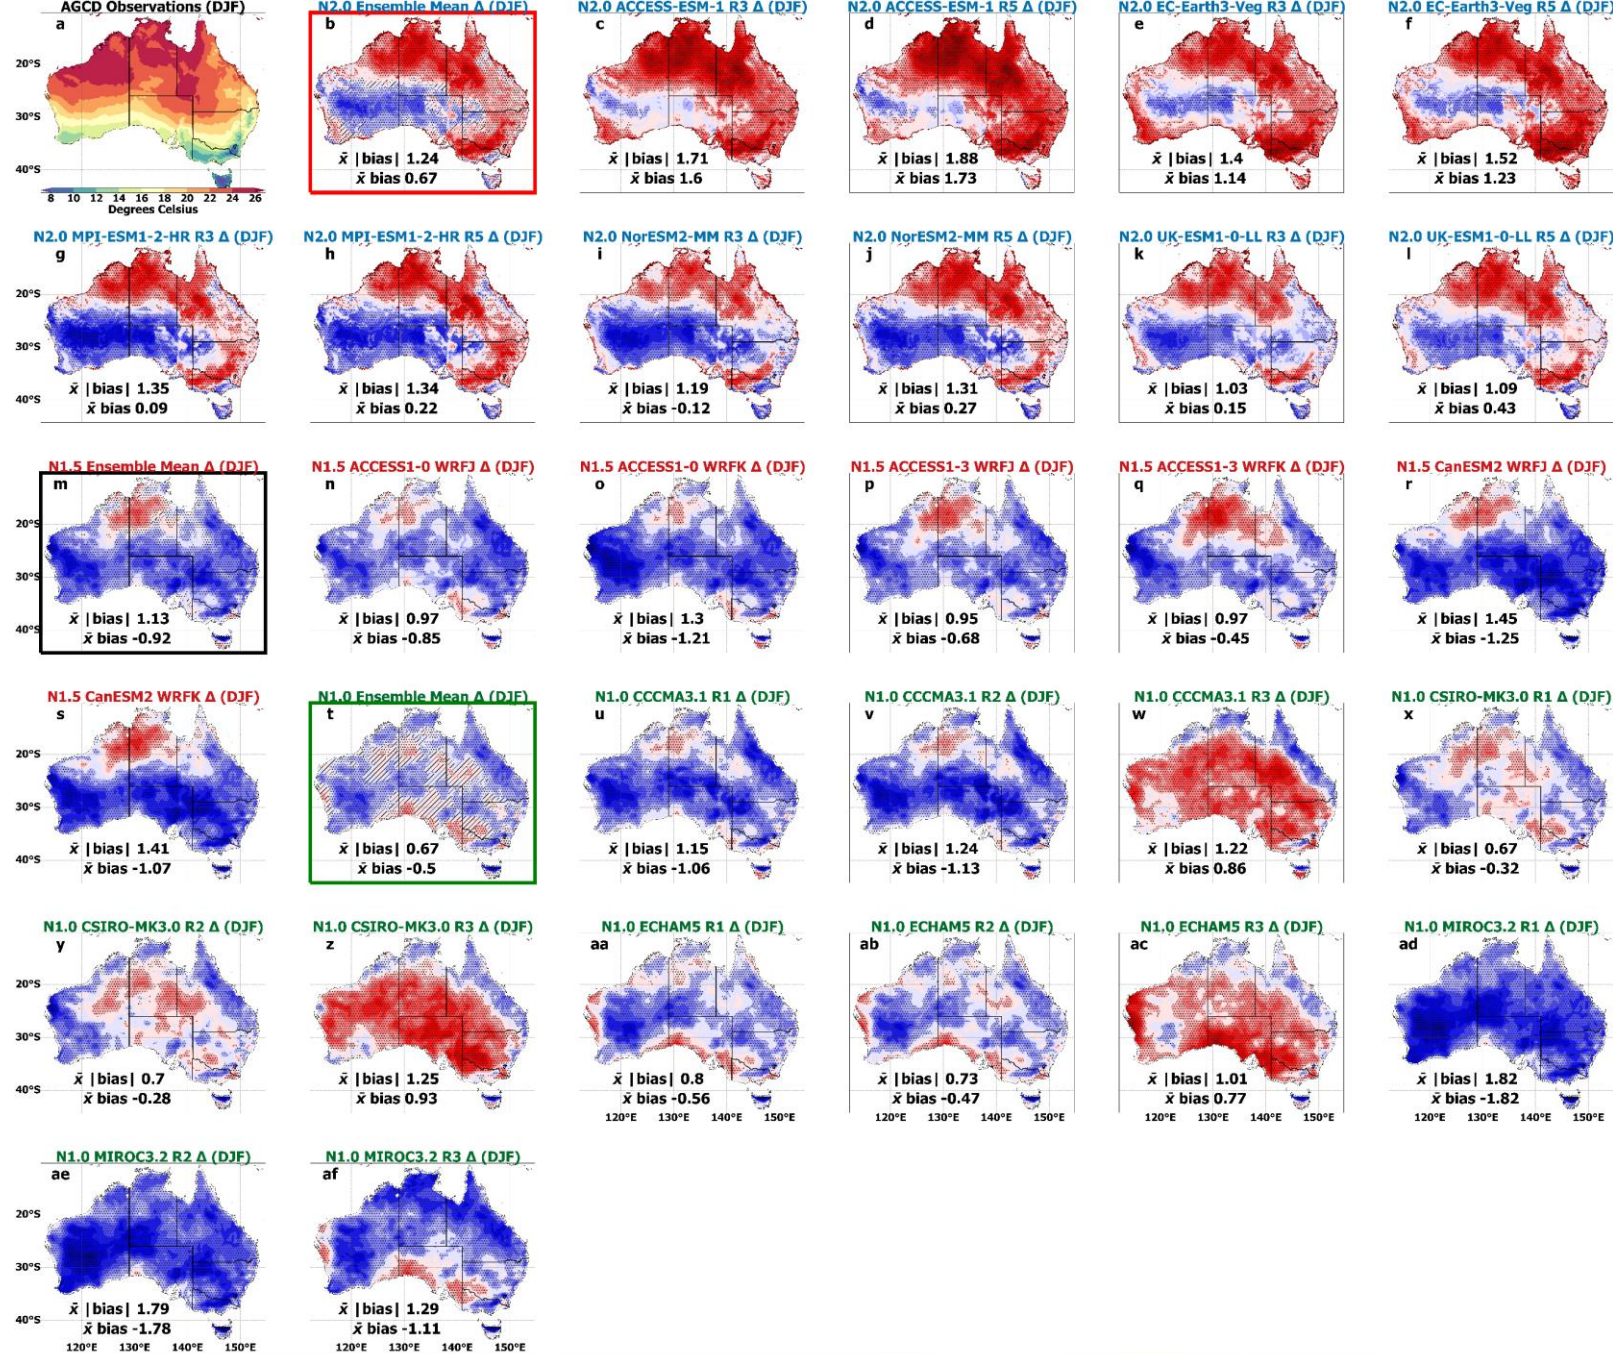

**Fig. S9** DJF mean near-surface atmospheric minimum temperature biases for NARcliM2.0, 1.5 and 1.0 ensemble means and individual ensemble members with respect to Australian Gridded Climate Data (AGCD) observations for 1990-2009. Stippling as per Fig.S4.

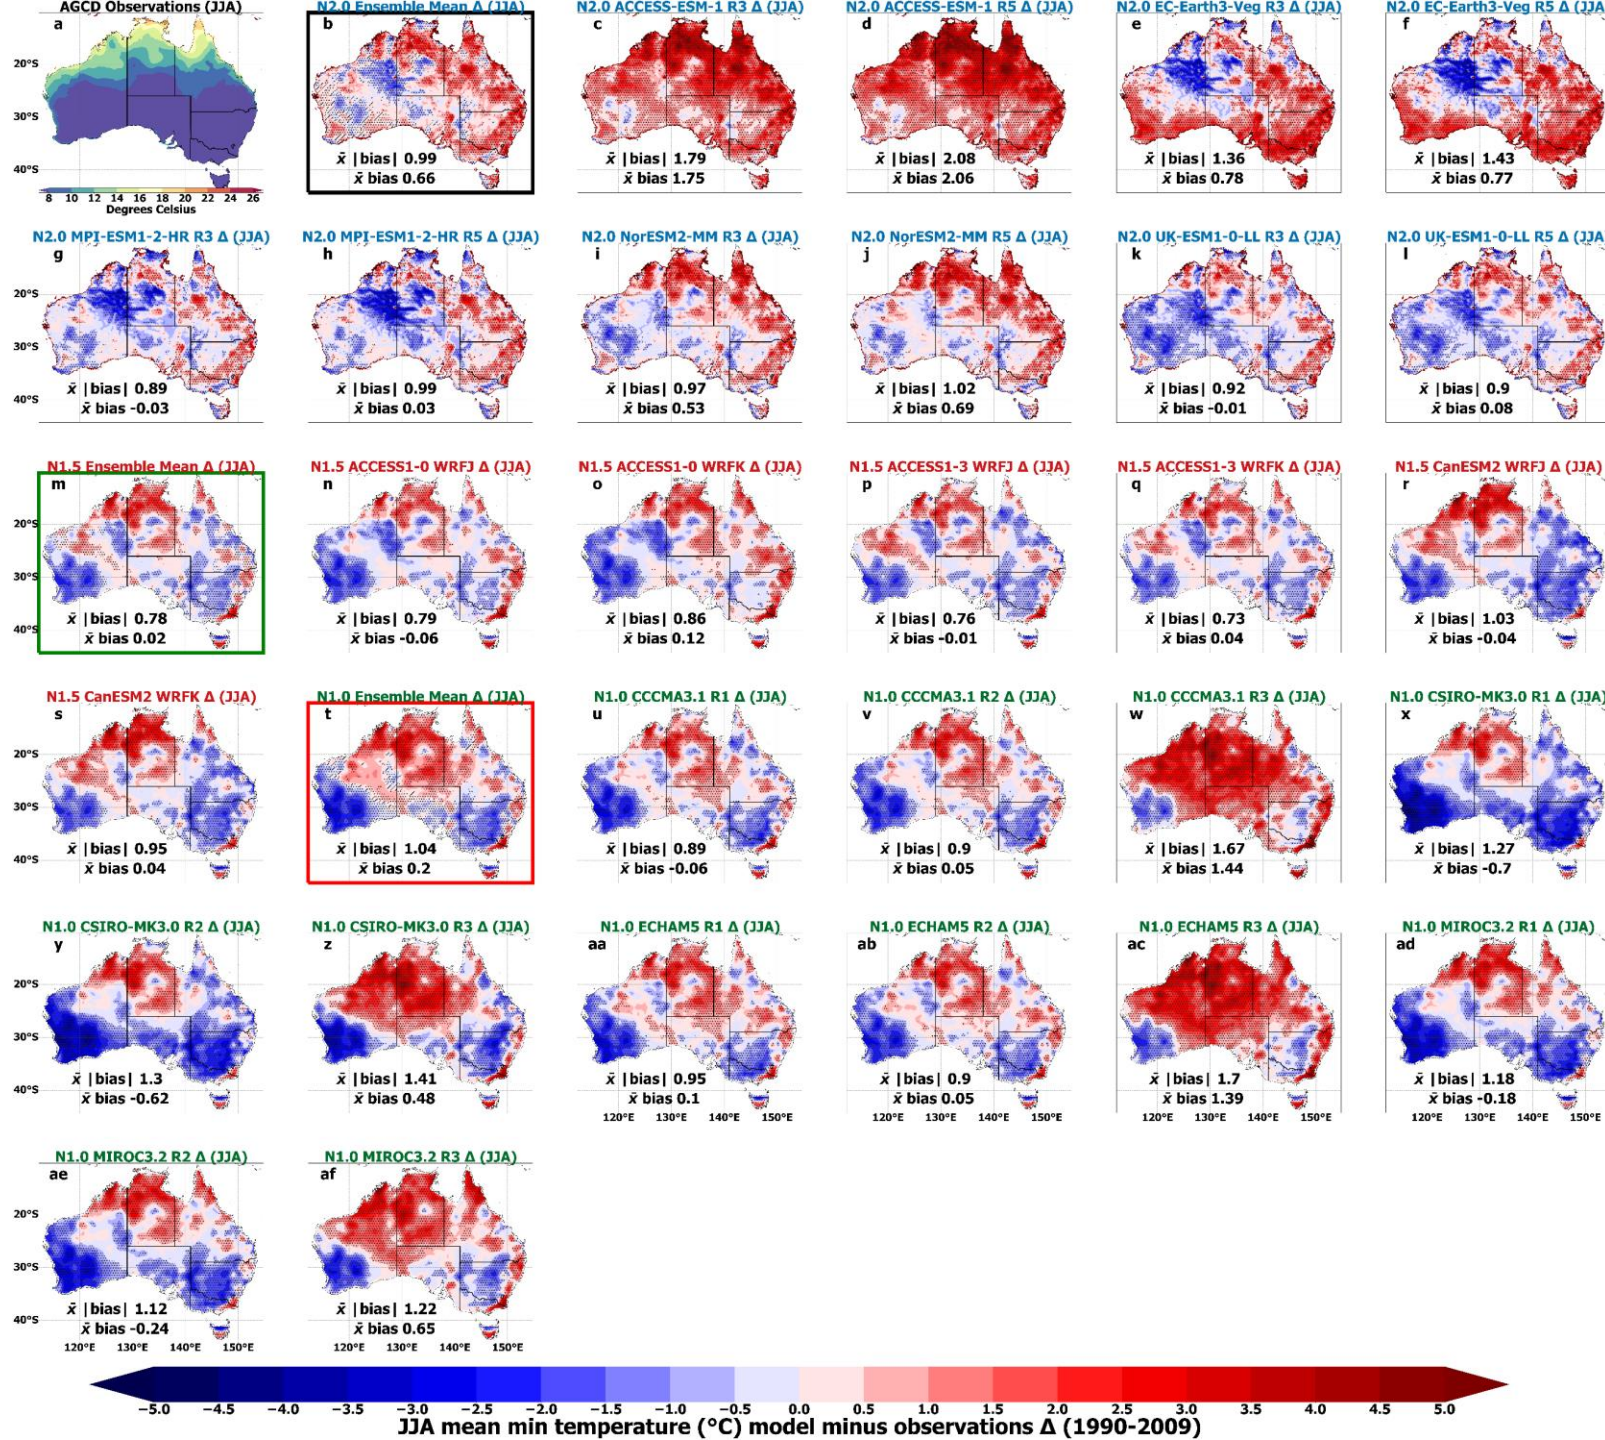

**Fig. S10** JJA mean near-surface atmospheric minimum temperature biases for NARClIM2.0, 1.5 and 1.0 ensemble means and individual ensemble members with respect to Australian Gridded Climate Data (AGCD) observations for 1990-2009. Stippling as per Fig.S4.

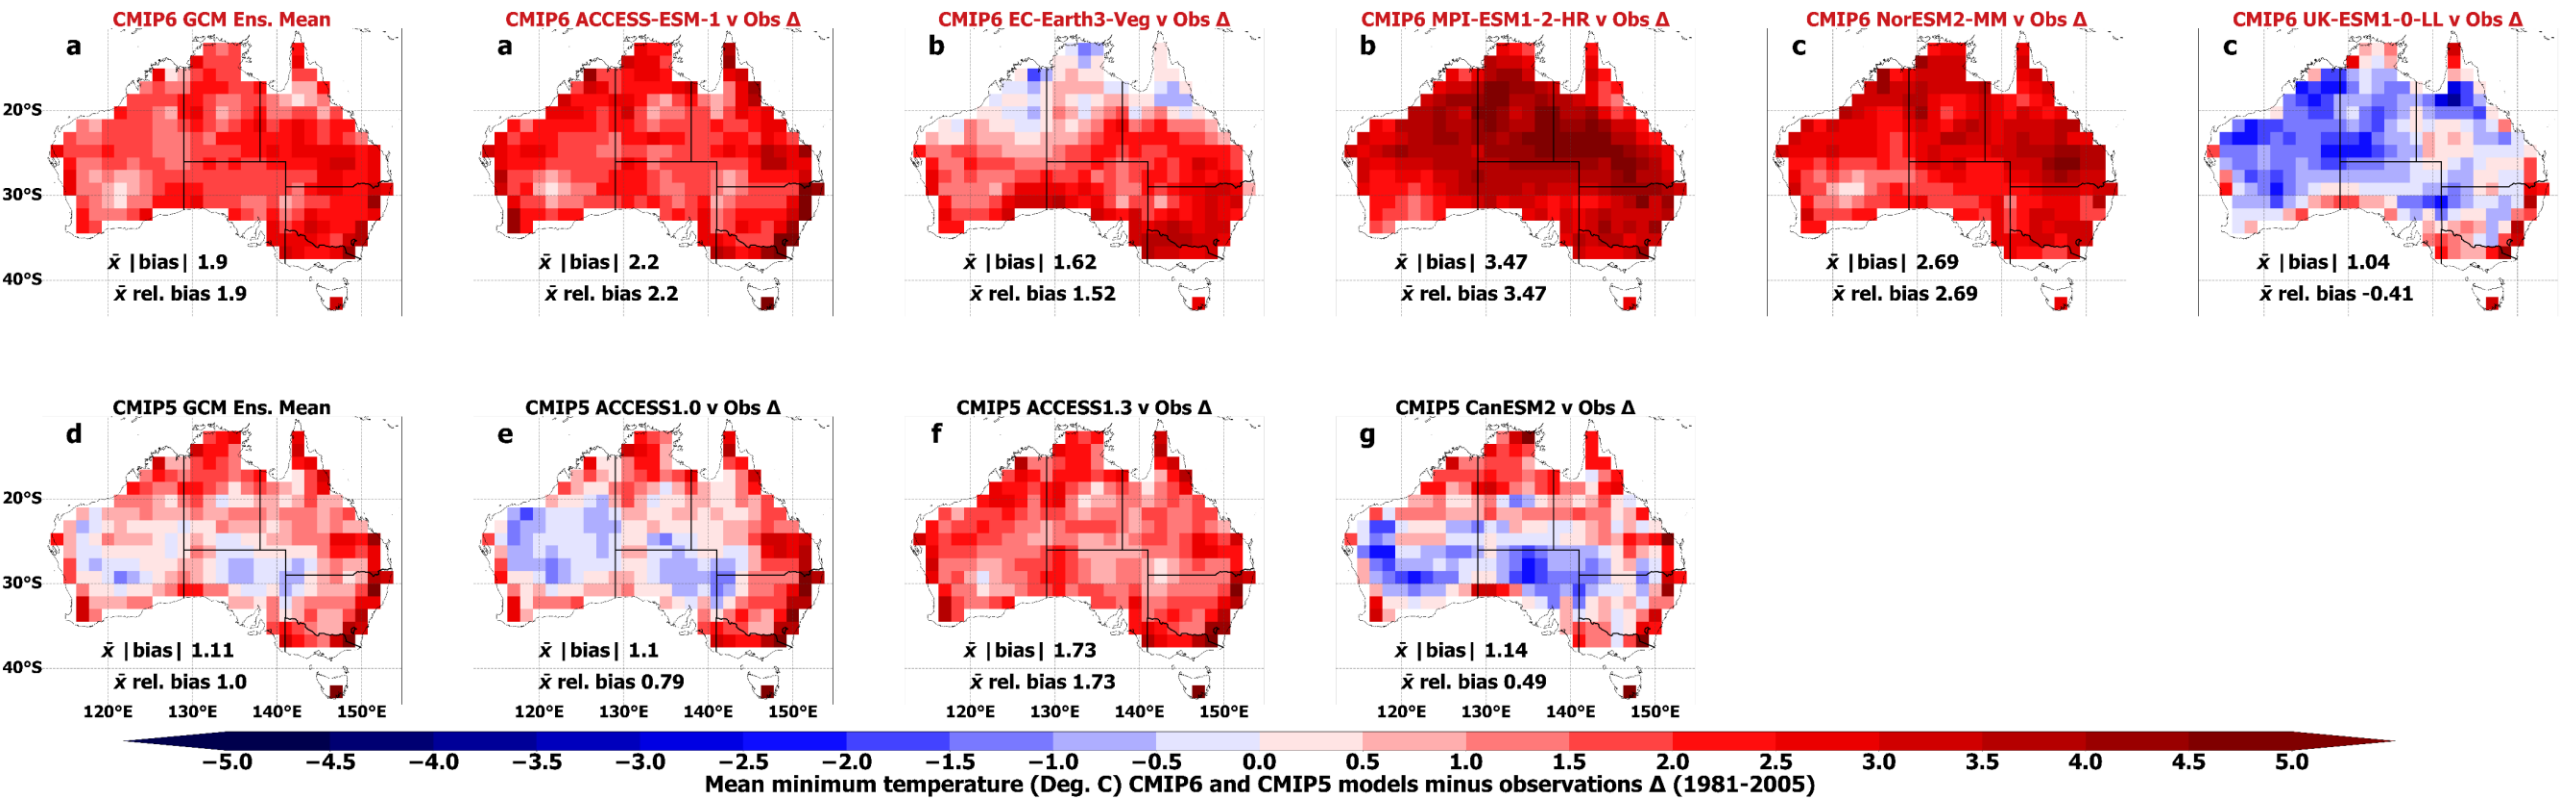

Figure S11. GCM annual mean minimum temperature bias relative to AGCD observations.

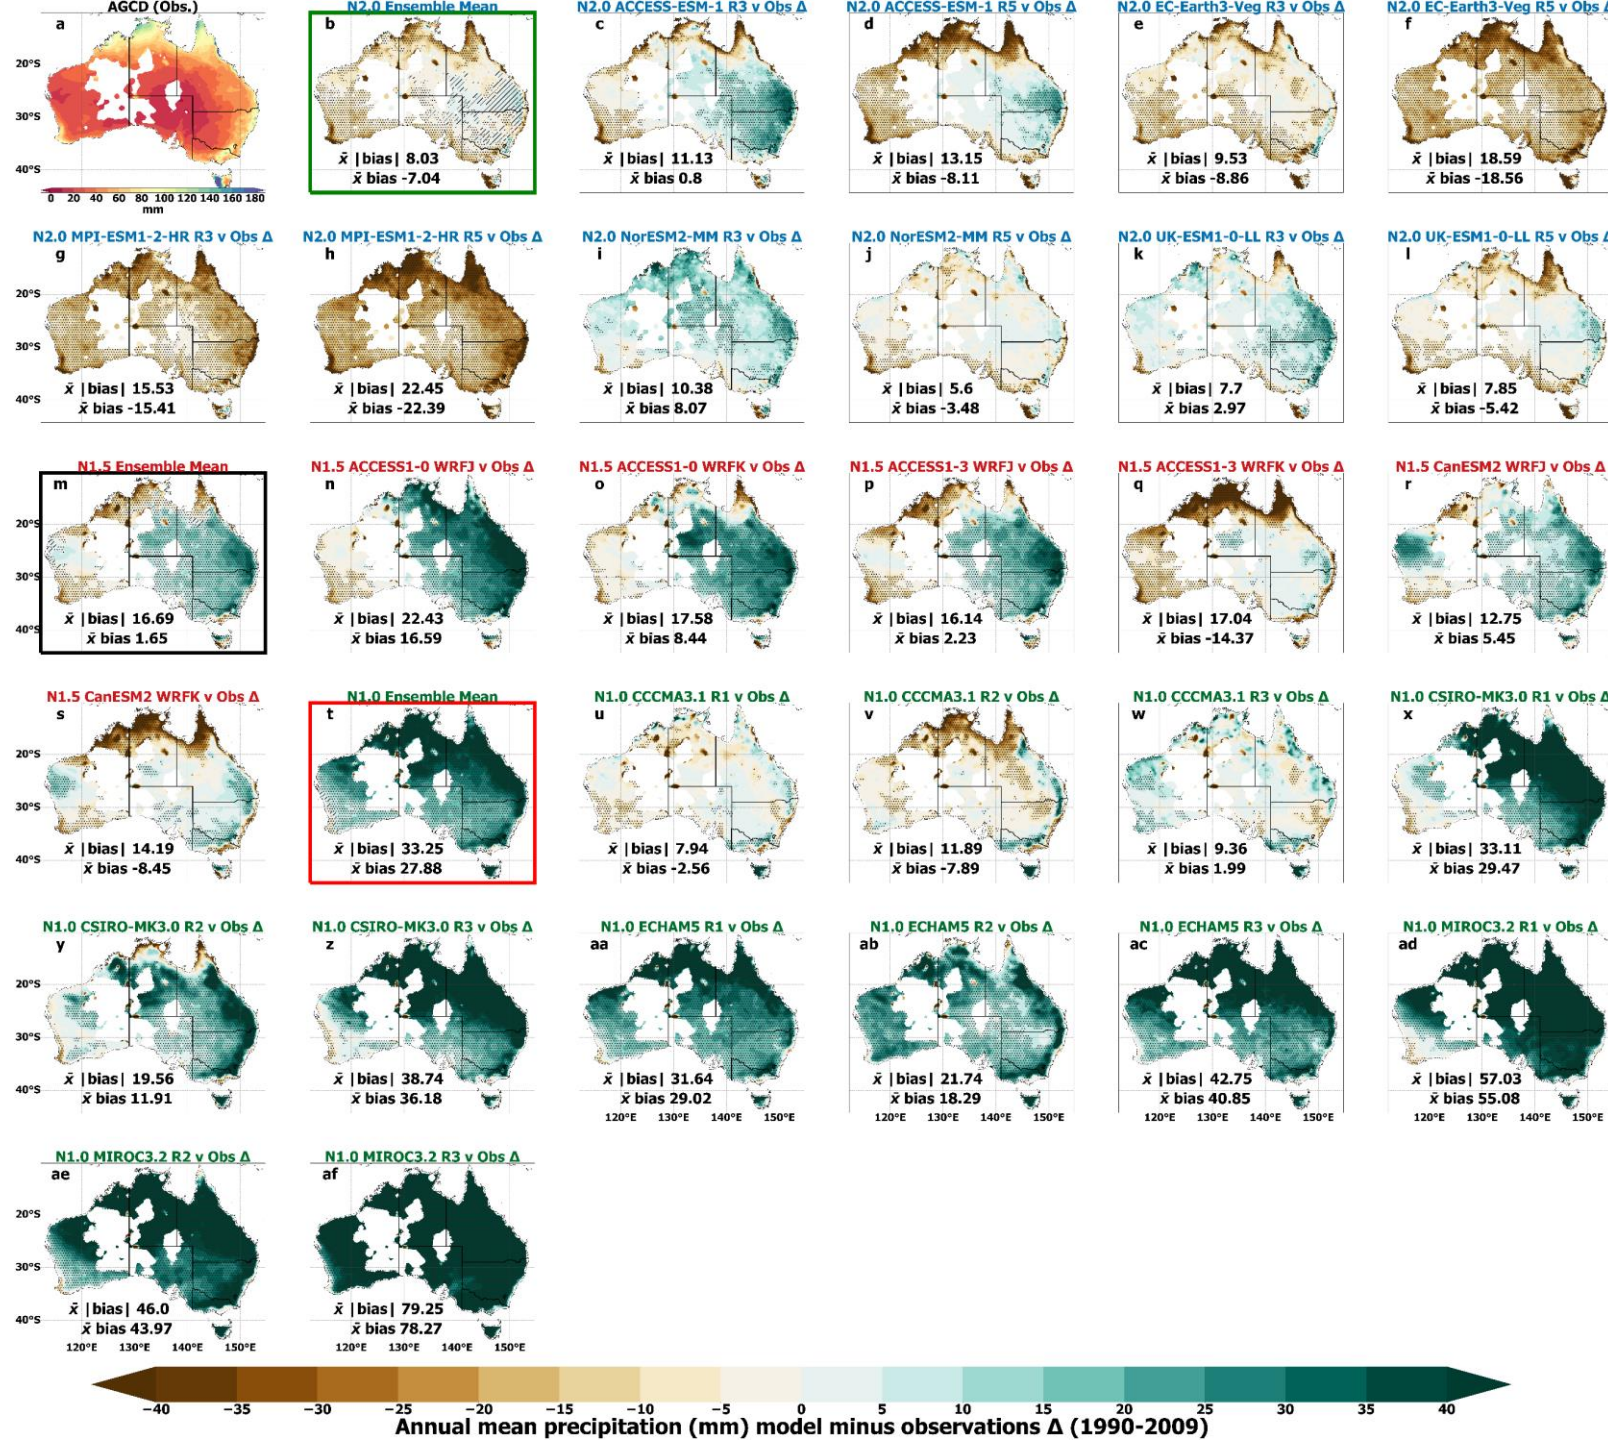

**Fig.S12** Annual mean precipitation biases for NARcliM2.0, 1.5 and 1.0 ensemble means and individual ensemble members with respect to Australian Gridded Climate Data (AGCD) observations for 1990-2009. Panel boundaries for ensemble means (b,m,t) in green (red) indicate the RCMs with lowest (highest) area-averaged mean absolute biases. Stippling as per Fig.S4.

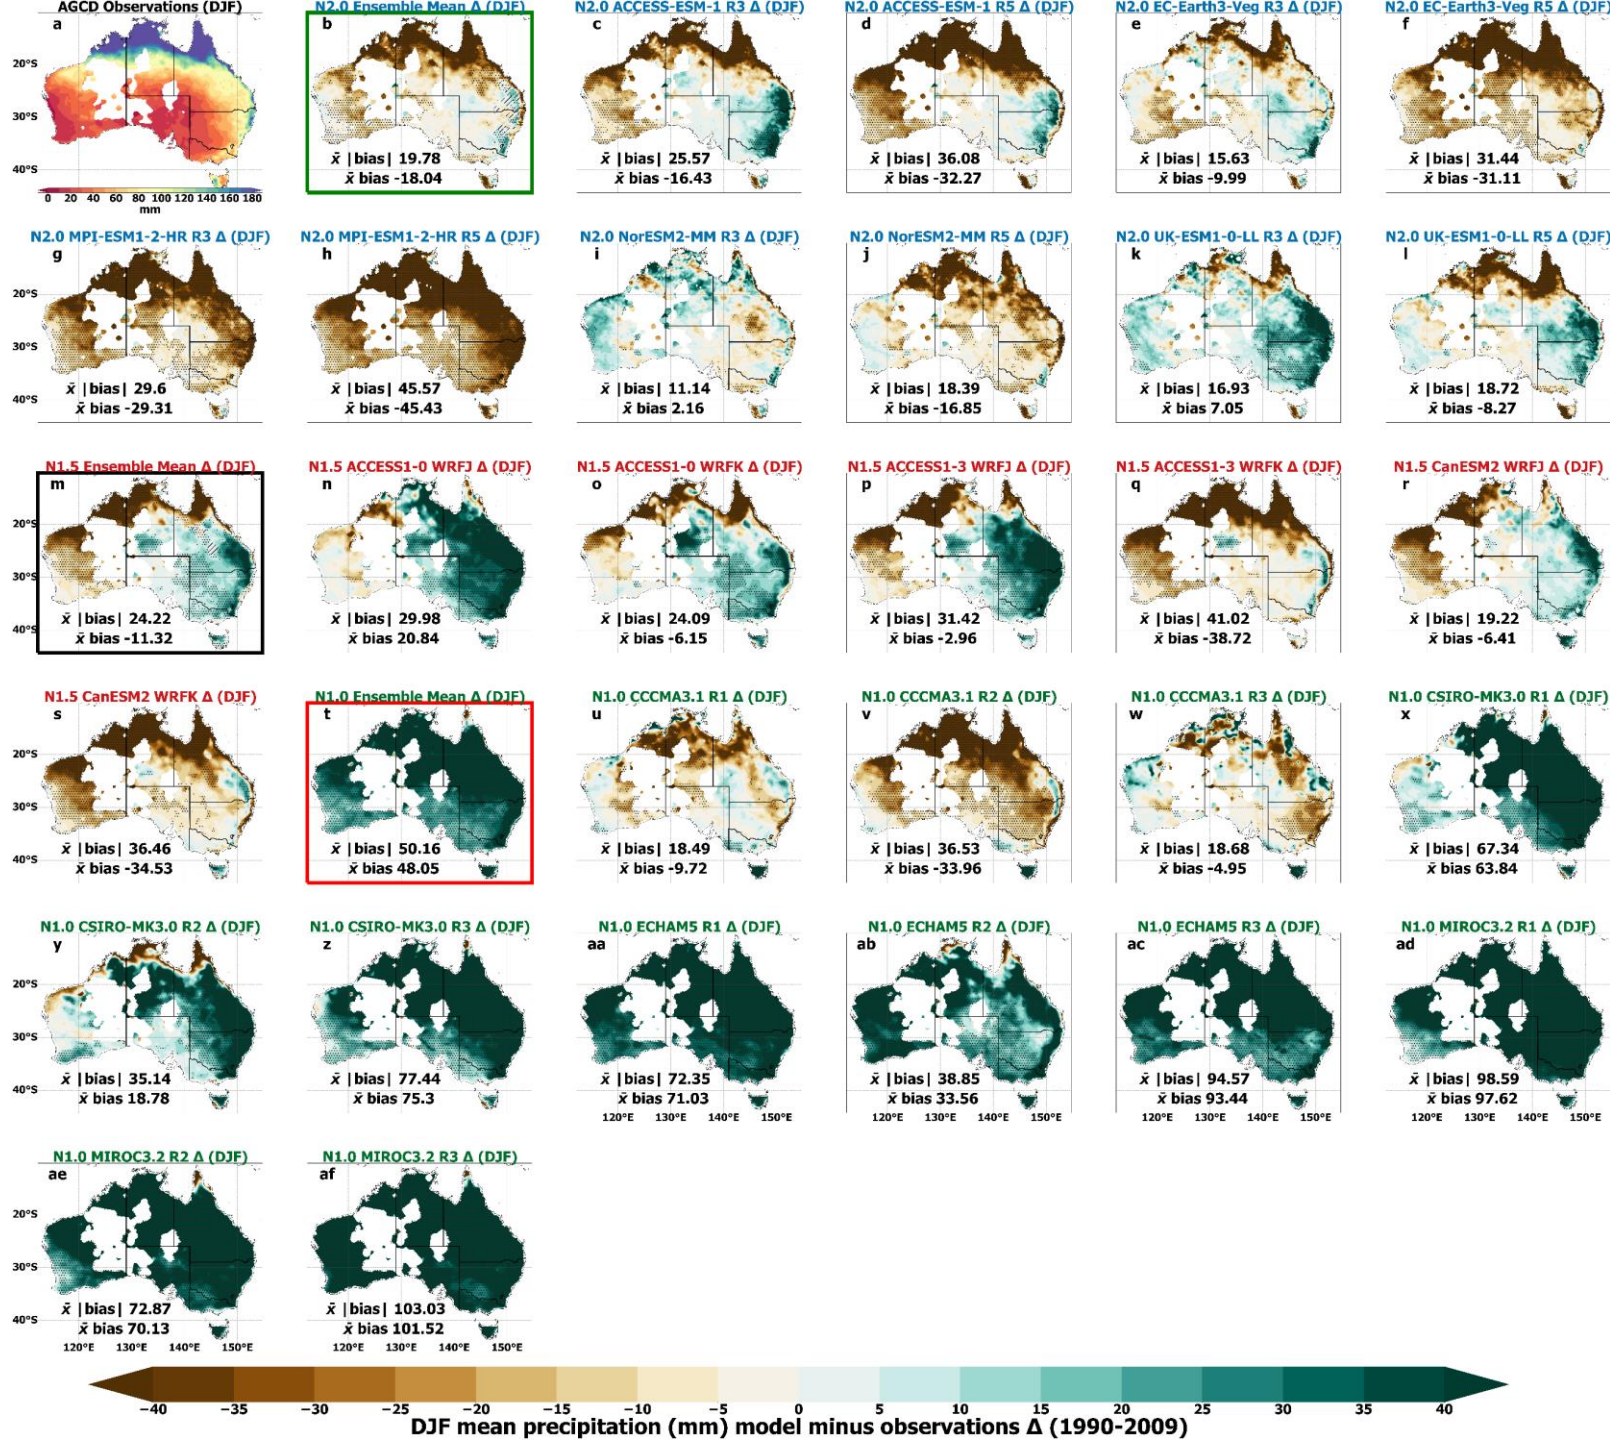

**Fig. S13** DJF mean precipitation biases for NARClm2.0, 1.5 and 1.0 ensemble means and individual ensemble members with respect to Australian Gridded Climate Data (AGCD) observations for 1990-2009. Stippling as per Fig.S4.



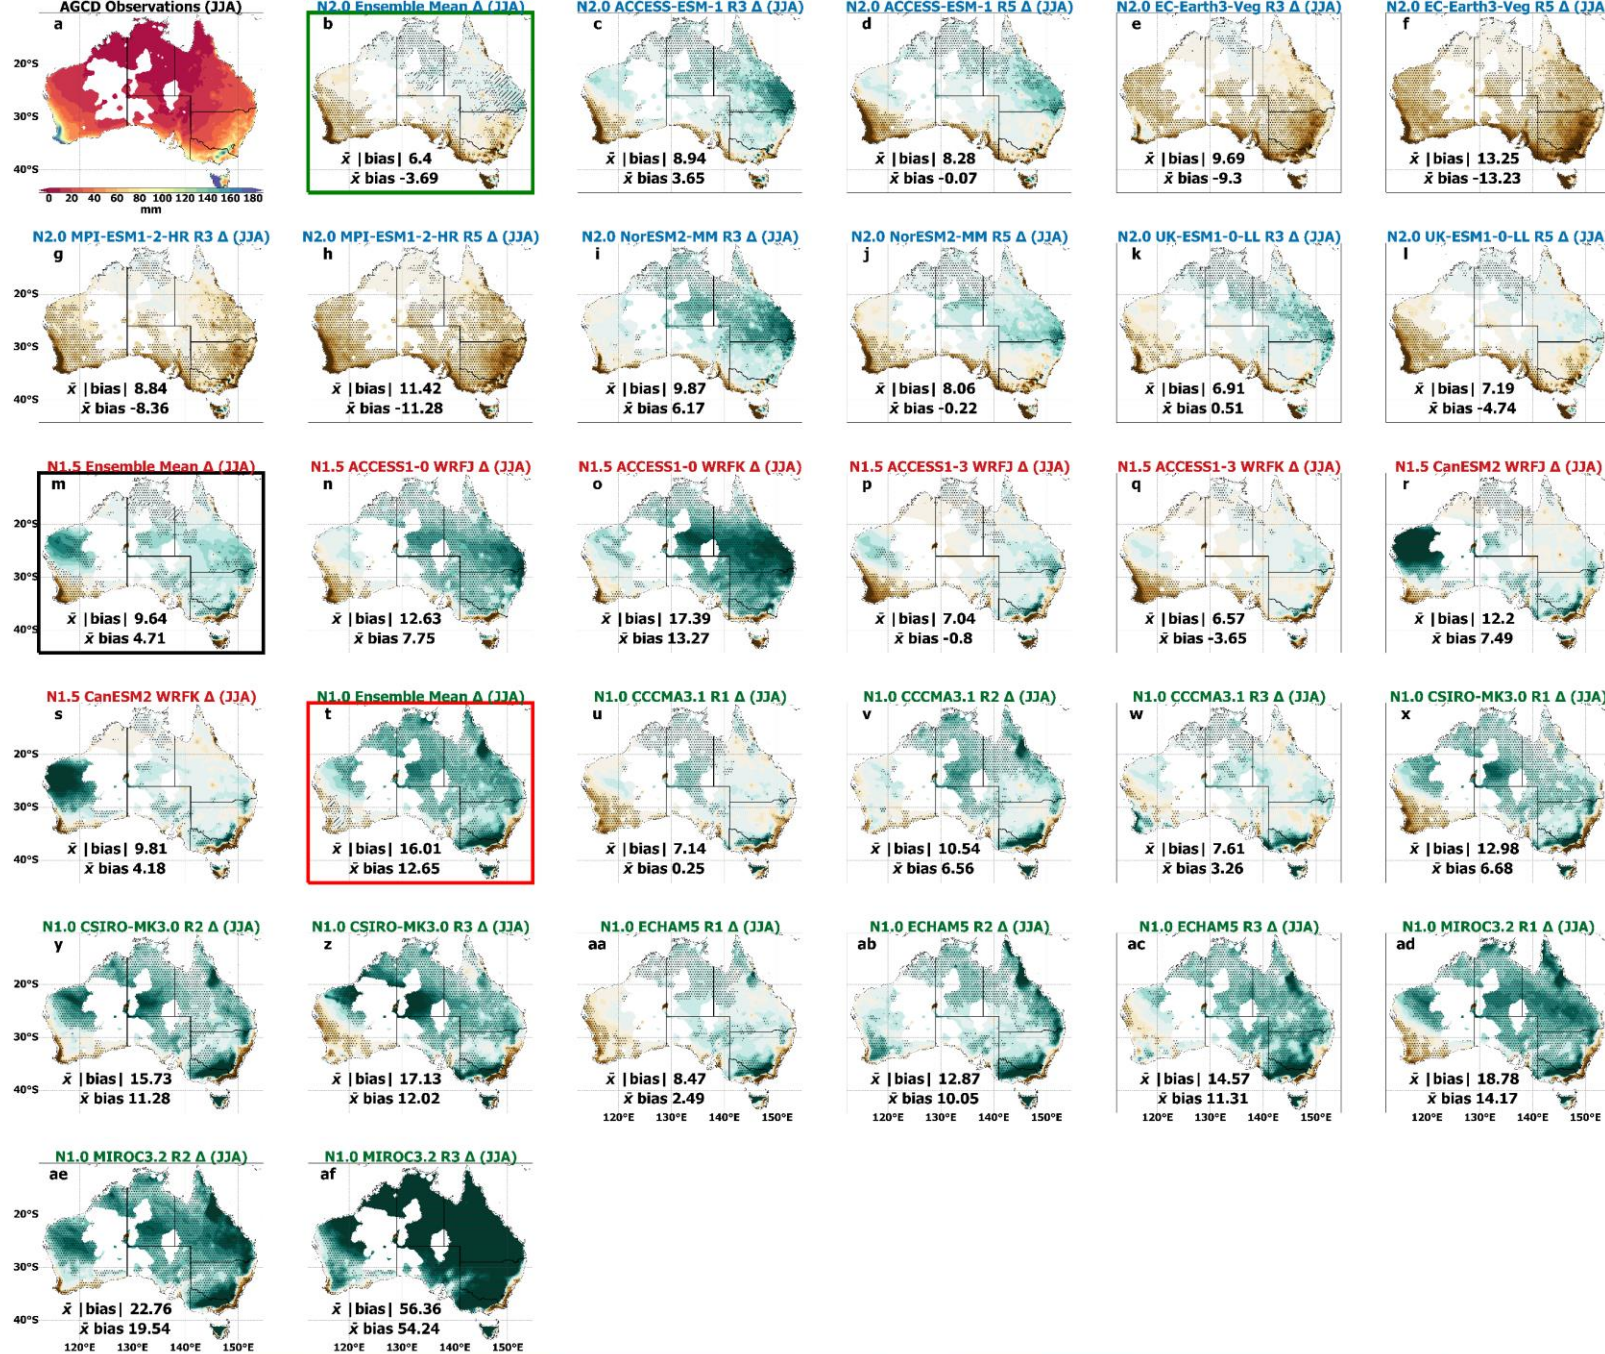

**Fig. S14** JJA mean precipitation biases for NARClm2.0, 1.5 and 1.0 ensemble means and individual ensemble members with respect to Australian Gridded Climate Data (AGCD) observations for 1990-2009. Stippling as per Fig.S4.

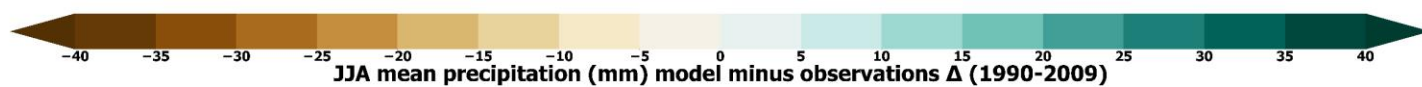

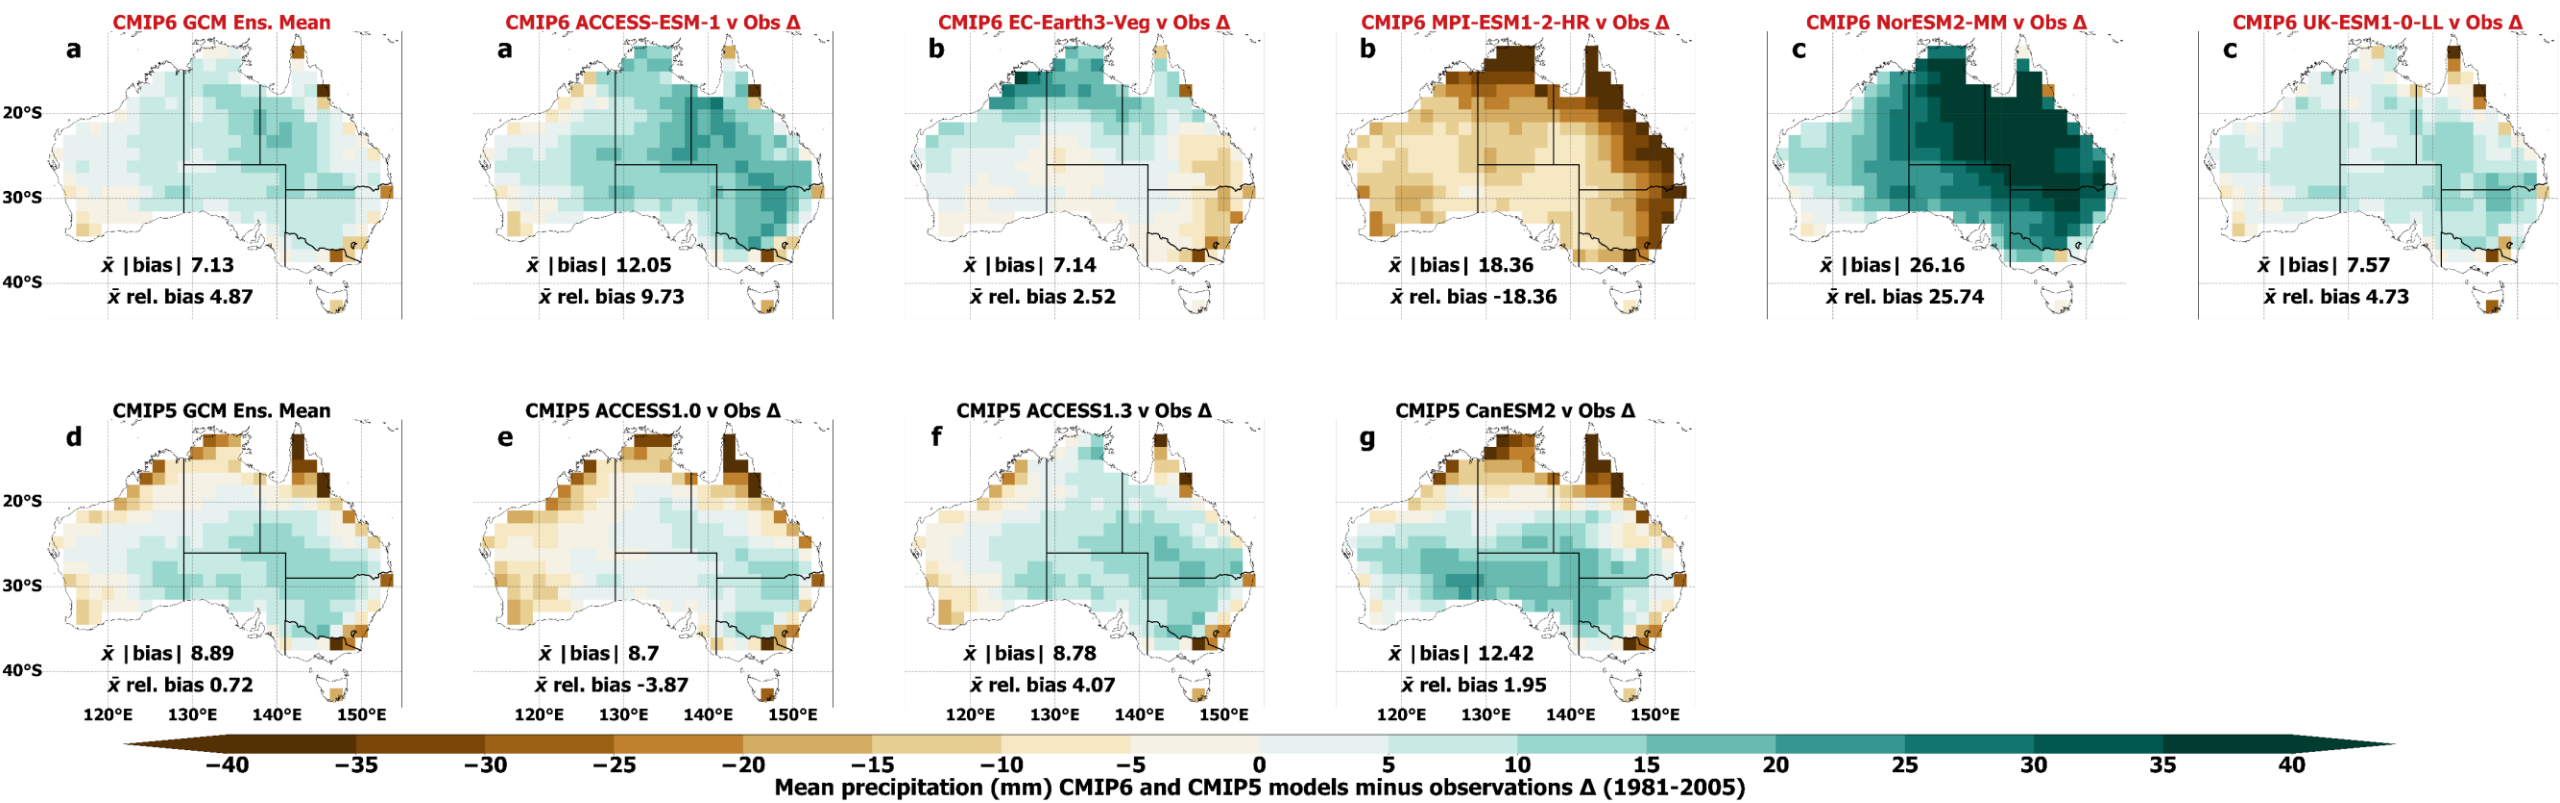

Figure S15. GCM annual mean precipitation bias relative to AGCD observations

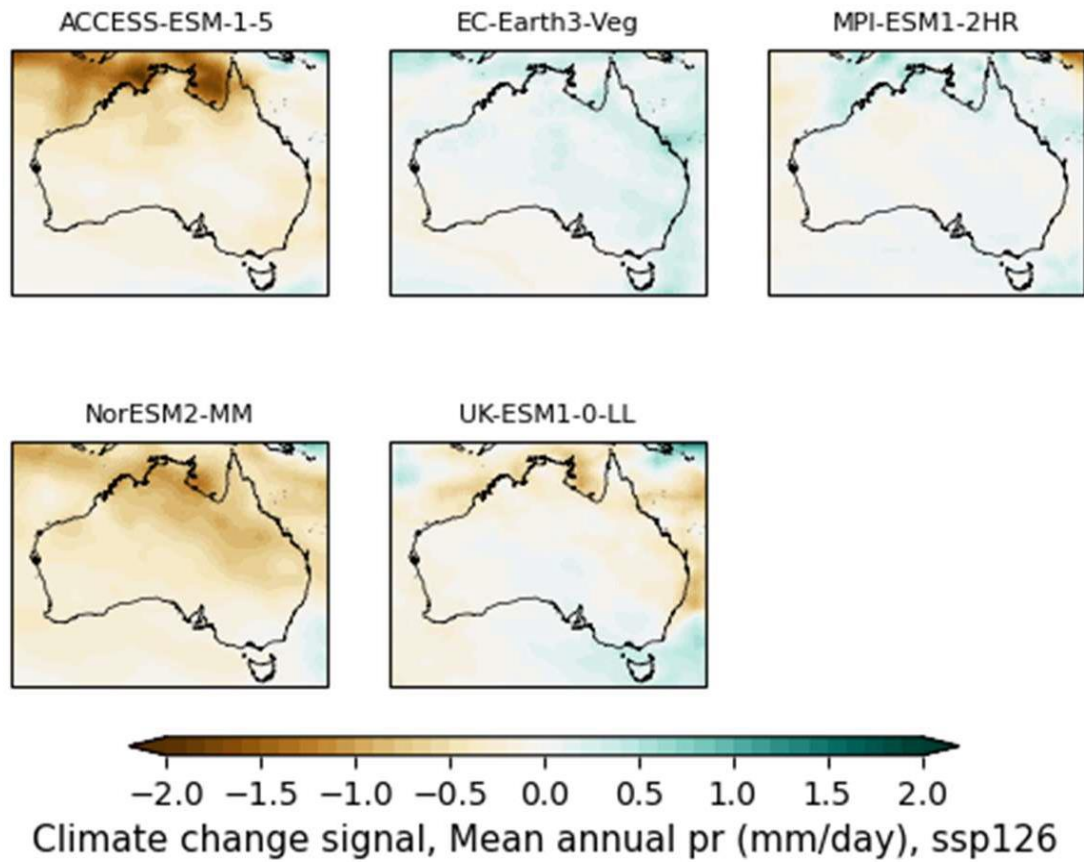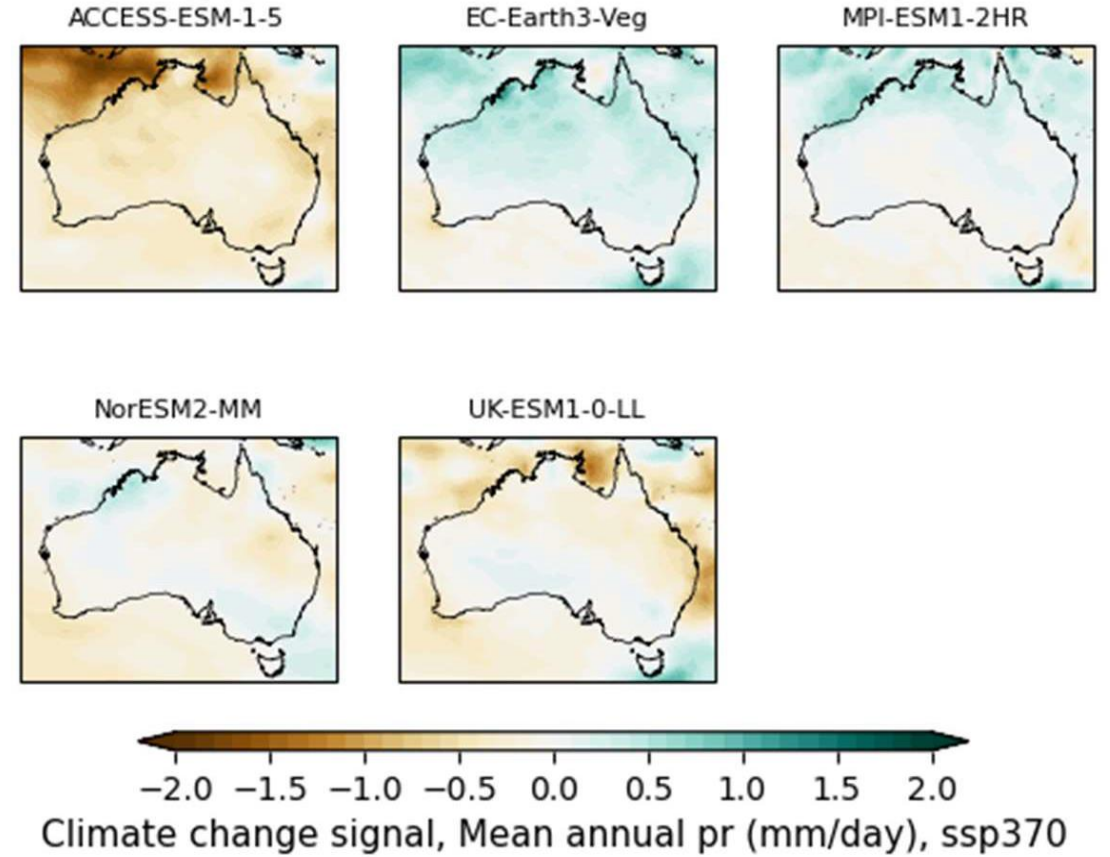

**Fig. S16** Climate change signals (1990-2009 versus 2060-2079) for annual mean precipitation for CMIP6 GCMs under SSP1-2.6 (left panel) and CMIP6 GCMs under SSP3-7.0 (right panel) used to force NARClIM2.0 RCMs.
